# Supplementary material for: Nickel-catalysed regio- and stereoselective hydrocyanation of alkynoates and its mechanistic insights proposed by DFT calculations
Source: Royal Society of Chemistry journal article supplement (doi:10.1039/d4ob00380b), 2024-01-01
Supplement: d4ob00380b1.pdf [file d4ob00380b1.pdf]

## Supplementary Information for

### Nickel-catalyzed Regio- and Stereoselective Hydrocyanation of Alkynoates and Its Mechanistic Insights Proposed by DFT Calculations

Shigeru Arai,<sup>\*a,b</sup> Koichi Nakazawa,<sup>a</sup> Xiao-Fei Yang,<sup>a</sup> Masaya Nakajima,<sup>a,c</sup> Shinji Harada,<sup>a,b,d</sup> and Atsushi Nishida<sup>a</sup>

E-mail: araisgr@chiba-u.jp

<sup>a</sup> Graduate School of Pharmaceutical Sciences, Chiba University, 1-8-1 Inohana, Chuo-ku, Chiba 260-8675, Japan.

<sup>b</sup> Molecular Chirality Research Center, Chiba University, 1-33 Yayoi-cho, Inage-ku, Chiba 263-8522, Japan.

<sup>c</sup> Graduate School of Pharmaceutical Sciences, The University of Tokyo, 7-3-1 Hongo, Bunkyo-ku, Tokyo 113-0033, Japan.

<sup>d</sup> Institute for Advanced Academic Research, Chiba University, 1-33 Yayoi-cho, Inage-ku, Chiba 263-8522, Japan.

#### Contents

|                                             |             |
|---------------------------------------------|-------------|
| 1. General remarks                          | page S1     |
| 2. Experimental procedure and spectral data | page S2-4   |
| 3. NMR spectra                              | page S5-17  |
| 4. DFT studies                              | page S18-24 |
| 5. X-ray data                               | page S25    |

**General remarks**

All reactions were performed with dry solvents and reagents that were purified by the usual methods. Reactions were monitored by thin-layer chromatography carried out on 0.25 mm Merck silica gel plates (60F-254). Column chromatography was performed with Wakogel® 60N from Wako Pure Chemical Industries. Infrared (IR) spectra were recorded on JUSCO FT/IR-4700 spectrophotometer. NMR spectra were recorded on JEOL-JMN-ECZ400 and -ECZ600 spectrometers operating at 400 and 600 MHz for <sup>1</sup>H NMR and at 100 and 150 MHz for <sup>13</sup>C NMR, with calibration using residual undeuterated solvent as an internal reference. Mass spectra were measured by The AccuTOFLC-plus JMS-T100LP (TOF) for LRMS and HRMS. Microwave were operated on CEMDISCOVER SYSTEM at 908005 (model number). Melting points were collected by placing the sample on a glass coverslip on a heating block of a melting temperature measurement device ATM-02. X-ray crystallographic analysis was measured by Rigaku MicroMax-007HF. X-ray crystallographic data were collected at  $-180 \pm 1$  °C using filtered CuK $\alpha$  radiation. Ellipsoids are drawn at the 50% probability level.

**General procedure for Ni-catalyzed hydrocyanation of alkynoates, synthesis of (*E*)-2a:**

A mixture of TMSCN (0.19 mL, 1.5 mmol, 5.0 eq) and trifluoroethanol (0.11 mL, 1.5 mmol, 5.0 eq) was stirred for 10 min at room temperature and then toluene (0.6 mL) and ethyl 2-butynoate (**1a**) (85.5 mg, 0.3 mmol) and Ni[(P(OPh)<sub>3</sub>]<sub>4</sub> (39.0 mg, 0.03 mmol, 10 mol%) were added. After being stirred for 2 h at 100 °C under argon atmosphere, the reaction mixture was charged on a silica gel pad. The following column chromatography (hexane:AcOEt = 9:1) gave (*E*)-**2a** (83.8 mg, 0.27 mmol, 71%, 10:1) as a colorless oil. Its stereoselectivity was also determined by <sup>1</sup>H NMR of the crude product to be 10:1.

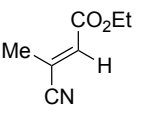 **(*E*)-Ethyl-3-cyanobut-2-enoate** <sup>1</sup>H NMR (CDCl<sub>3</sub>, 400 MHz) δ: 1.30 (t, *J* = 7.2 Hz, 3H), 2.35 (d, *J* = 1.6 Hz, 3H), 4.24 (q, *J* = 7.2 Hz, 2H), 6.42 (t, *J* = 1.6 Hz, 1H); <sup>13</sup>C NMR (CDCl<sub>3</sub>, 100 MHz) δ: 14.0, 17.2, 61.2, 118.8, 125.9, 132.7, 163.8; IR (ATR) ν: 3736, 2927, 2208, 1724, 1623, 1372, 1066 cm<sup>-1</sup>; HRMS (ESI) *m/z* calcd for C<sub>7</sub>H<sub>9</sub>NNaO<sub>2</sub> [M+Na]<sup>+</sup> 162.0531 found 162.0529. Colorless oil.

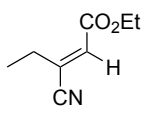 **(*E*)-Ethyl-3-cyanopent-2-enoate** <sup>1</sup>H NMR (CDCl<sub>3</sub>, 400 MHz) δ: 1.21 (t, *J* = 7.6 Hz, 3H), 1.31 (t, *J* = 7.2 Hz, 3H), 2.81 (dq, *J* = 1.2, 7.6 Hz, 2H), 4.23 (q, *J* = 7.2 Hz, 2H), 6.38 (t, *J* = 1.2 Hz, 1H); <sup>13</sup>C NMR (CDCl<sub>3</sub>, 100 MHz) δ: 12.3, 14.0, 23.6, 61.2, 118.0, 131.8, 132.6, 163.7; IR (ATR) ν: 3677, 2207, 1723, 1624, 1327 cm<sup>-1</sup>; HRMS (ESI) *m/z* calcd for C<sub>8</sub>H<sub>11</sub>NNaO<sub>2</sub> [M+Na]<sup>+</sup> 176.0688 found 176.0692. Colorless oil.

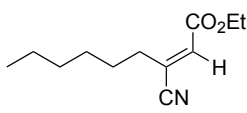 **(*E*)-Ethyl-3-cyanonon-2-enoate** <sup>1</sup>H NMR (CDCl<sub>3</sub>, 400 MHz) δ: 0.89 (t, *J* = 6.8 Hz, 3H), 1.29-1.40 (m, 9H), 1.65 (quin, *J* = 7.6 Hz, 2H), 2.77 (t, *J* = 7.6 Hz, 2H), 4.23 (q, *J* = 6.8 Hz, 2H), 6.40 (s, 1H); <sup>13</sup>C NMR (CDCl<sub>3</sub>, 100 MHz) δ: 13.9, 14.0, 22.4, 27.9, 28.6, 30.0, 31.3, 61.2, 118.2, 131.5, 132.2, 163.7; IR (ATR) ν: 3676, 2240, 1713, 1515, 1498 cm<sup>-1</sup>; HRMS (ESI) *m/z* calcd for C<sub>12</sub>H<sub>19</sub>NNaO<sub>2</sub> [M+Na]<sup>+</sup> 232.1314 found 232.1319. Colorless oil.

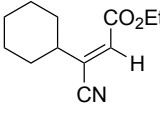 **(*E*)-Ethyl-3-cyano-3-cyclohexacrylate** <sup>1</sup>H NMR (CDCl<sub>3</sub>, 400 MHz) δ: 1.20-1.29 (m, 1H), 1.30-1.33 (m, 4H), 1.36-1.48 (m, 3H), 1.70-1.83 (m, 5H), 3.47-3.53 (m, 1H), 4.23 (q, *J* = 6.8 Hz, 2H), 6.32 (s, 1H); <sup>13</sup>C NMR (CDCl<sub>3</sub>, 100 MHz) δ: 14.0, 25.3, 25.5, 31.0, 37.7, 61.2, 117.1, 130.8, 137.0, 163.7; IR (ATR) ν: 3751, 2221, 1720, 1623 cm<sup>-1</sup>; HRMS (ESI) *m/z* calcd. for C<sub>12</sub>H<sub>17</sub>NNaO<sub>2</sub> [M+Na]<sup>+</sup> 230.1157 found 230.1161. Colorless oil.

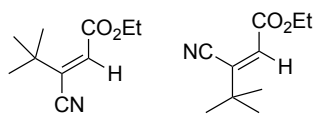

(*E*)-, and (*Z*)-**2e** (1.4:1)

**(*E*)- and (*Z*)-Ethyl-2-cyano-4,4-dimethylpent-2-enoate**  $^1\text{H}$

NMR ( $\text{CDCl}_3$ , 400 MHz)  $\delta$ : 1.30 (s, 0.58x 9H), 1.32 (s, 0.42 x 9H), 1.33 (t,  $J = 7.2$  Hz, 0.58 x 3H), 1.36 (t,  $J = 7.2$  Hz, 0.42 x 3H), 4.25 (q,  $J = 7.2$  Hz, 0.58 x 2H), 4.32 (q,  $J = 7.2$  Hz, 0.42 x 3H), 6.44 (s, 0.58 x 1H), 7.65 (s, 0.42 x 1H);  $^{13}\text{C}$  NMR ( $\text{CDCl}_3$ ,

100 MHz)  $\delta$ : 13.9, 14.0, 28.7, 28.8, 35.0, 35.8, 61.7, 62.5, 105.7, 114.2, 118.1, 132.5, 132.9, 162.1, 164.6, 171.8; IR (ATR)  $\nu$ : 1732, 1368, 1254  $\text{cm}^{-1}$ ; HRMS (ESI)  $m/z$  calcd. for  $\text{C}_{10}\text{H}_{15}\text{NNaO}_2$   $[\text{M}+\text{Na}]^+$  204.1001 found 204.0994. Colorless oil.

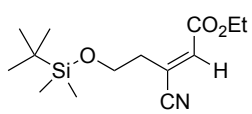

(*E*)-**2f**

**(*E*)-Ethyl-5-((*tert*-butyldimethylsilyloxy)-3-cyanopent-2-enoate**  $^1\text{H}$

NMR ( $\text{CDCl}_3$ , 400 MHz)  $\delta$ : 0.09 (s, 6H), 0.89 (s, 9H), 1.35 (t,  $J = 7.2$  Hz, 3H), 3.03 (dt,  $J = 1.2, 6.4$  Hz, 2H), 3.90 (t,  $J = 6.4$  Hz, 2H), 4.25 (q,  $J = 7.2$  Hz, 2H), 6.51 (d,  $J = 1.2$  Hz, 1H);  $^{13}\text{C}$  NMR ( $\text{CDCl}_3$ ,

100 MHz)  $\delta$ : 14.0, 18.2, 25.8, 33.4, 60.8, 61.2, 118.2, 128.9, 133.8, 163.7; IR (ATR)  $\nu$ : 3648, 2955, 2222, 1720, 1380  $\text{cm}^{-1}$ ; HRMS (ESI)  $m/z$  calcd for  $\text{C}_{14}\text{H}_{25}\text{NNaO}_3\text{Si}$   $[\text{M}+\text{Na}]^+$  306.1501 found 306.1500. Colorless oil.

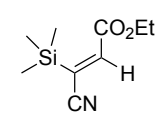

(*Z*)-**2g**

**(*Z*)-Ethyl-3-cyano-3-(trimethylsilyl) acrylate**  $^1\text{H}$  NMR ( $\text{CDCl}_3$ , 400 MHz)

$\delta$ : 0.35 (s, 6H), 1.33 (t,  $J = 7.2$  Hz, 3H), 4.25 (q,  $J = 7.2$  Hz, 2H), 7.04 (s, 1H);  $^{13}\text{C}$  NMR ( $\text{CDCl}_3$ , 100 MHz)  $\delta$ : -1.1, 14.1, 61.7, 119.7, 129.7, 134.4, 147.0, 164.5; IR (ATR)  $\nu$ : 3750, 2206, 1623, 1372  $\text{cm}^{-1}$ ; HRMS (ESI)  $m/z$  calcd for

$\text{C}_9\text{H}_{15}\text{NNaO}_2\text{Si}$   $[\text{M}+\text{Na}]^+$  220.0770 found 220.0769. Colorless oil.

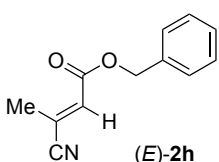

(*E*)-**2h**

**(*E*)-Benzyl-3-cyanobut-2-enoate**  $^1\text{H}$  NMR ( $\text{CDCl}_3$ , 400 MHz)  $\delta$ : 2.36

(d,  $J = 1.6$  Hz, 3H), 5.20 (s, 2H), 6.46 (q,  $J = 1.6$  Hz, 1H), 7.35-7.37 (m, 5H);  $^{13}\text{C}$  NMR ( $\text{CDCl}_3$ , 100 MHz)  $\delta$ : 17.5, 67.1, 118.9, 126.7, 128.6, 128.77, 128.83, 132.4, 135.1, 164.8; IR (ATR)  $\nu$ : 3629, 2959, 2225, 1479,

1348  $\text{cm}^{-1}$ ; HRMS (ESI)  $m/z$  calcd for  $\text{C}_{12}\text{H}_{11}\text{NNaO}_2$   $[\text{M}+\text{Na}]^+$  201.0790 found 201.0788. Colorless oil.

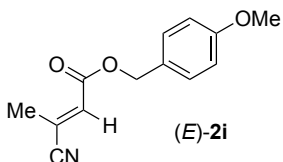

(*E*)-**2i**

**(*E*)-4-Methoxybenzyl-3-cyanobut-2-enoate**  $^1\text{H}$  NMR ( $\text{CDCl}_3$ , 400

MHz)  $\delta$ : 2.34 d,  $J = 1.2$  Hz, 3H), 3.81 (s, 3H), 5.13 (s, 2H), 6.42 (t,  $J = 1.2$  Hz, 1H), 6.90 (d,  $J = 8.4$  Hz, 2H), 7.30 (d,  $J = 8.4$  Hz, 2H);  $^{13}\text{C}$  NMR ( $\text{CDCl}_3$ , 100 MHz)  $\delta$ : 17.3, 55.2, 66.8, 114.0, 118.7, 126.3,

127.0, 130.3, 132.4, 159.9, 163.6; IR (ATR)  $\nu$ : 3676, 2855, 2221, 1722, 1636, 1374  $\text{cm}^{-1}$ ; HRMS (ESI)  $m/z$  calcd for  $\text{C}_{13}\text{H}_{13}\text{NNaO}_3$   $[\text{M}+\text{Na}]^+$  254.0793 found 254.0791. Colorless solid. mp. 54-55  $^{\circ}\text{C}$ .

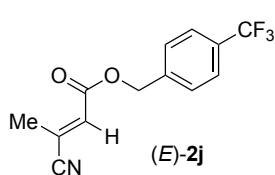

**(E)-4-(Trifluoromethyl)benzyl-3-cyanobut-2-enoate**  $^1\text{H}$  NMR ( $\text{CDCl}_3$ , 400 MHz)  $\delta$ : 2.37 (d,  $J = 1.2$  Hz, 3H), 5.26 (s, 2H), 6.47 (t,  $J = 1.2$  Hz, 1H), 7.48 (d,  $J = 6.4$  Hz, 2H), 7.64 (d,  $J = 6.4$  Hz, 2H);  $^{13}\text{C}$  NMR ( $\text{CDCl}_3$ , 100 MHz)  $\delta$ : 17.4, 65.9, 118.6, 125.6, 125.7, 127.2, 128.4, 131.7, 138.9, 163.4; IR (ATR)  $\nu$ : 3676, 2855, 2207, 1623, 1449  $\text{cm}^{-1}$ ; HRMS (ESI)  $m/z$  calcd for  $\text{C}_{13}\text{H}_{10}\text{F}_3\text{NNaO}_2$   $[\text{M}+\text{Na}]^+$  292.0561 found 292.0567. Colorless solid. mp. 40-41  $^\circ\text{C}$ .

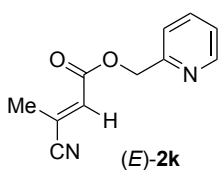

**(E)-Pyridin-2-ylmethyl-3-cyanobut-2-enoate**  $^1\text{H}$  NMR ( $\text{CDCl}_3$ , 400 MHz)  $\delta$ : 2.38 (d,  $J = 1.6$  Hz, 3H), 5.31 (s, 2H), 6.54 (d,  $J = 1.6$  Hz, 1H), 7.26 (d,  $J = 7.2$  Hz, 1H), 7.36 (d,  $J = 8.0$  Hz, 1H), 7.74 (t,  $J = 8.0$  Hz, 1H), 8.61 (d,  $J = 4.0$  Hz, 1H);  $^{13}\text{C}$  NMR ( $\text{CDCl}_3$ , 100 MHz)  $\delta$ : 17.4, 67.3, 118.6, 121.9, 123.1, 126.9, 131.8, 136.8, 149.6, 154.7, 163.4; [IR (ATR)  $\nu$ : 2940, 2224, 1714, 1379, 1164  $\text{cm}^{-1}$ ; HRMS (ESI)  $m/z$  calcd for  $\text{C}_{11}\text{H}_{11}\text{N}_2\text{NaO}_2$   $[\text{M}+\text{Na}]^+$  203.0821 found 203.0825; Colorless solid. mp. 56-57  $^\circ\text{C}$ .

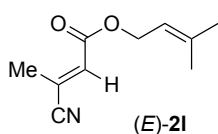

**(E)-3-Methylbut-2-en-1-yl-3-cyanobut-2-enoate**  $^1\text{H}$  NMR ( $\text{CDCl}_3$ , 400 MHz)  $\delta$ : 1.73 (s, 3H), 1.78 (s, 3H), 2.35 (d,  $J = 1.6$  Hz, 3H), 4.67 (d,  $J = 7.2$  Hz, 2H), 5.33-5.38 (m, 1H), 6.42 (q,  $J = 1.6$  Hz, 1H);  $^{13}\text{C}$  NMR ( $\text{CDCl}_3$ , 100 MHz)  $\delta$ : 17.2, 18.0, 25.7, 62.0, 117.6, 118.8, 125.9, 132.7, 140.3, 163.8; IR (ATR)  $\nu$ : 2225, 1719, 1216, 1144  $\text{cm}^{-1}$ ; HRMS (ESI)  $m/z$  calcd for  $\text{C}_{10}\text{H}_{13}\text{NNaO}_2$   $[\text{M}+\text{Na}]^+$  202.0884, found 202.0881. Colorless oil.

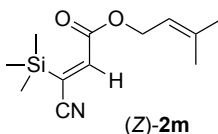

**(Z)-3-Methylbut-2-en-1-yl-3-cyano-3-(trimethylsilyl)acrylate**  $^1\text{H}$  NMR ( $\text{CDCl}_3$ , 400 MHz)  $\delta$ : 0.34 (s, 9H), 1.73 (s, 3H), 1.78 (s, 3H), 4.69 (d,  $J = 7.2$  Hz, 2H), 5.33-5.38 (m, 1H), 6.42 (s, 1H);  $^{13}\text{C}$  NMR ( $\text{CDCl}_3$ , 100 MHz)  $\delta$ : -1.1, 18.1, 25.8, 62.4, 117.5, 119.8, 134.2, 140.6, 147.0, 164.5; IR (ATR)  $\nu$ : 2207, 1723, 1251, 1197, 848  $\text{cm}^{-1}$ ; HRMS (ESI)  $m/z$  calcd for  $\text{C}_{12}\text{H}_{19}\text{NNaO}_2\text{Si}$   $[\text{M}+\text{Na}]^+$  260.1083, found 260.1081. Colorless oil.

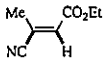

(E)-2a

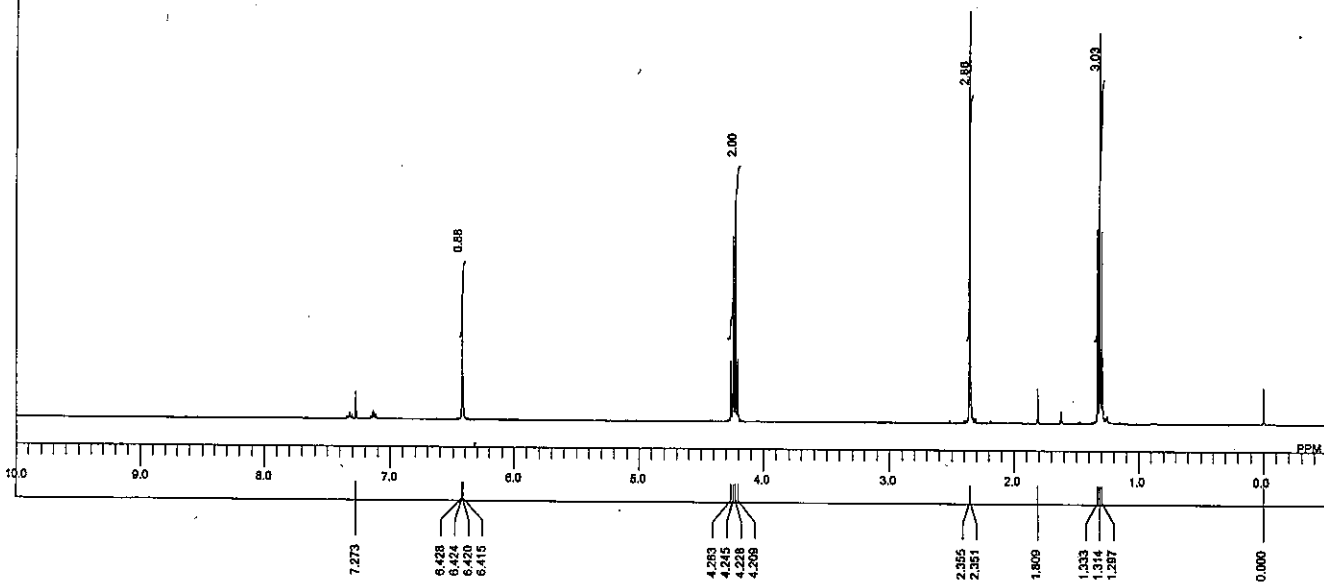

DFILE GSYXF01-79-F2  
 COMNT 1H  
 DATIM 2013-06-06 15:32  
 ORNUC single\_pulse\_exp  
 EXMOD 399.78 MHz  
 OBFRO 4.19 KHz  
 OBSFQ 7.29 Hz  
 POINT 16384  
 FREQU 5998.80 Hz  
 SCANS 8  
 ACQTM 2.7312 sec  
 PD 2.0000 sec  
 PW1 6.00 usec  
 IRNUC  
 CTEMP 22.7 c  
 SLVNT CDCL3  
 EXREF 0.00 ppm  
 BF 0.12 Hz  
 RGAIN 13

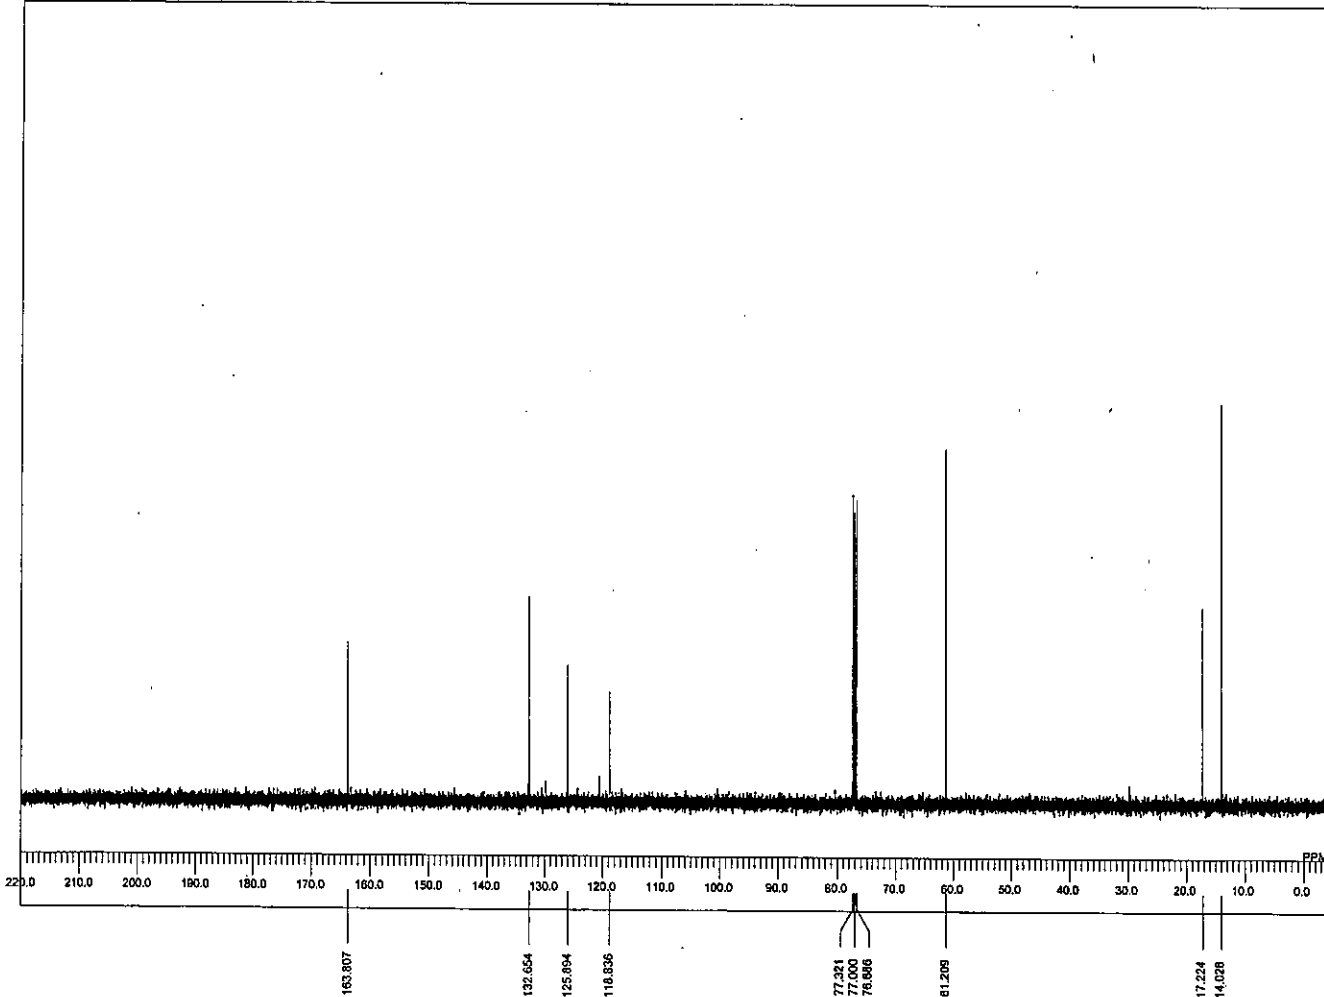

DFILE GSYXF01-79-TM  
 COMNT 13C  
 DATIM 2013-06-06 15:41  
 ORNUC single\_pulse\_dec  
 EXMOD 100.63 MHz  
 OBFRO 5.35 KHz  
 OBSFQ 5.86 Hz  
 POINT 32768  
 FREQU 25188.92 Hz  
 SCANS 235  
 ACQTM 1.3009 sec  
 PD 1.0000 sec  
 PW1 3.17 usec  
 IRNUC 1H  
 CTEMP 23.3 c  
 SLVNT CDCL3  
 EXREF 77.00 ppm  
 BF 0.12 Hz  
 RGAIN 24

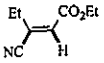

(E)-2b

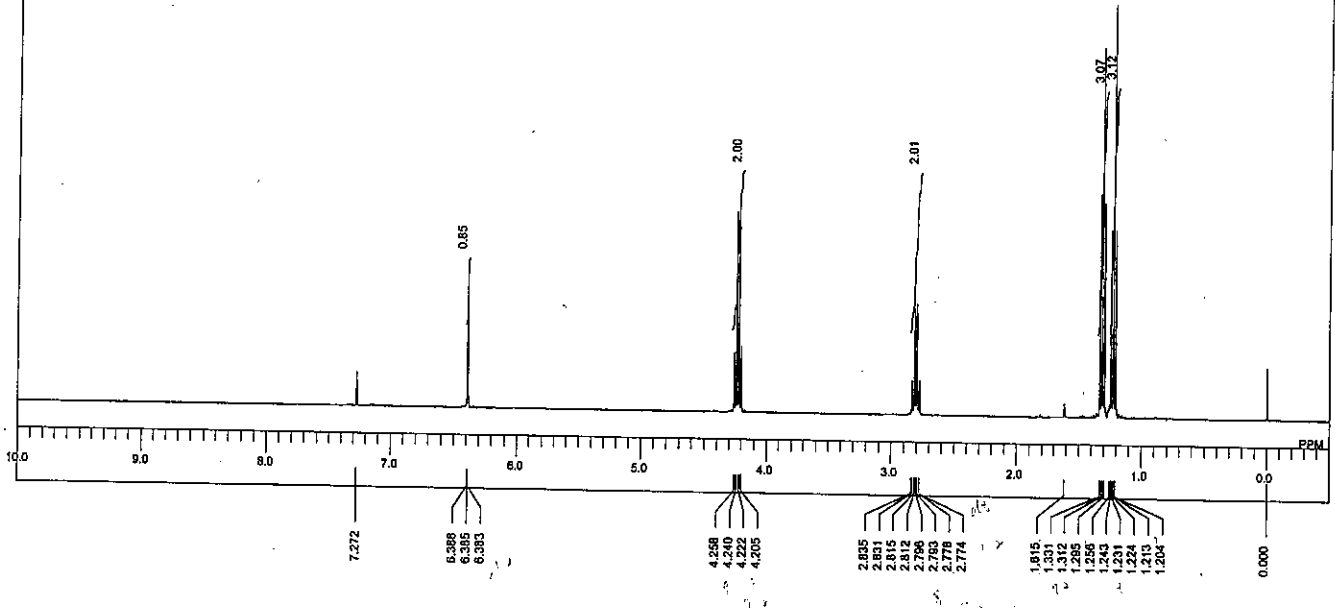

DFILE GSYXF01-78-Fr  
 COMNT  
 DATIM 2013-06-06 11:0  
 OBNUC 1H  
 EXMOD single\_pulse\_exp  
 OBFREQ 399.78 MHz  
 OBSSET 4.19 KHz  
 OBFIN 7.29 Hz  
 POINT 16384  
 FREQU 5998.80 Hz  
 SCANS 8  
 ACQTM 2.7312 sec  
 PD 2.0000 sec  
 PW1 6.00 usec  
 IRNUC  
 CTEMP 22.4 c  
 SLVNT CDCL3  
 EXREF 0.00 ppm  
 BF 0.12 Hz  
 RGAIN 12

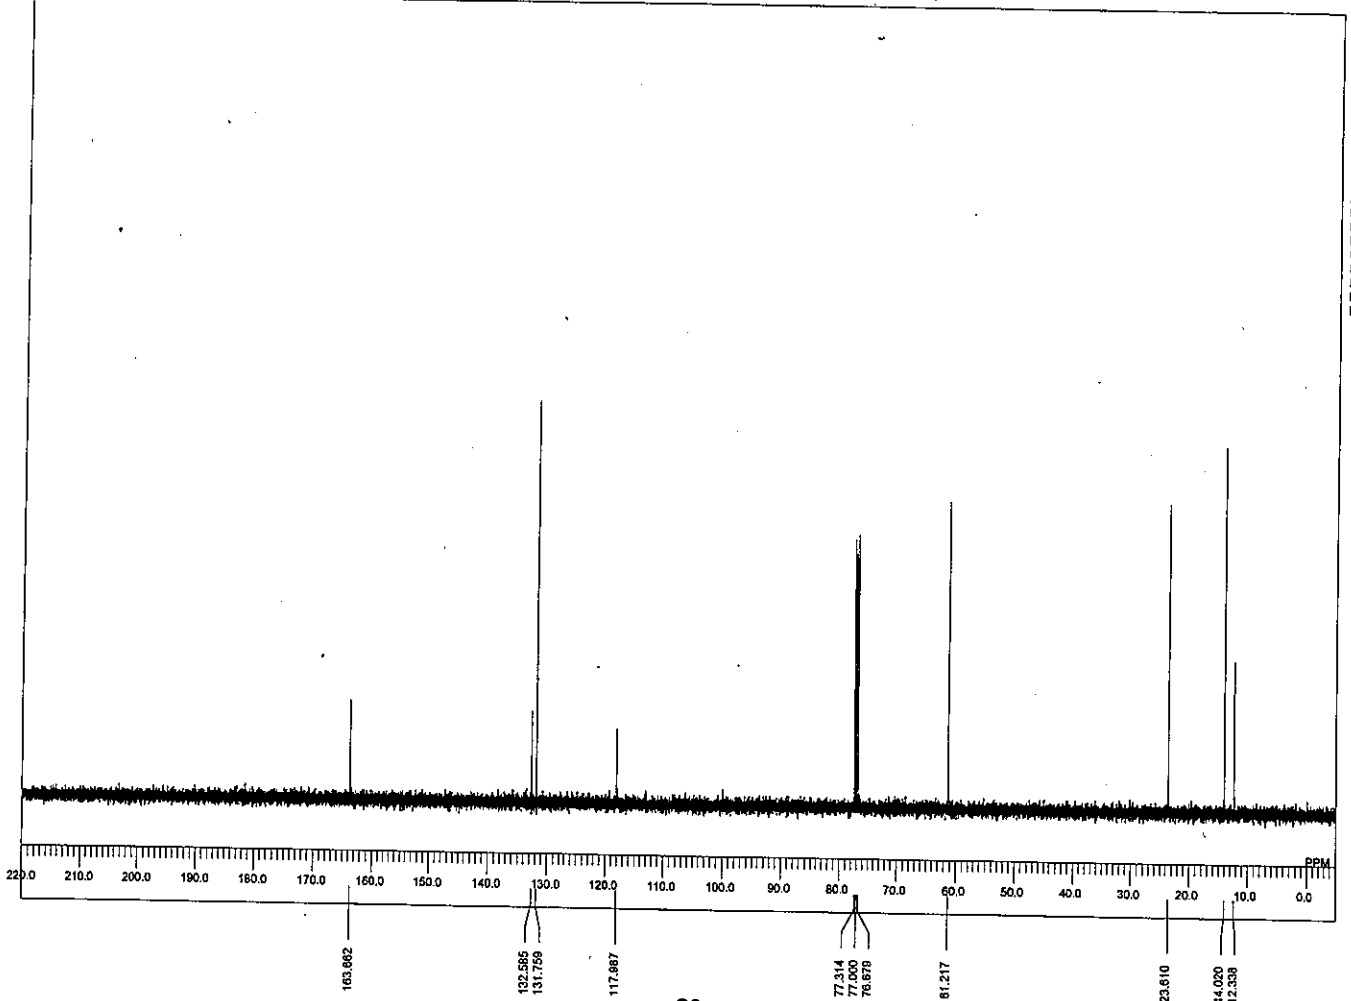

DFILE GSYXF01-78-TM  
 COMNT  
 DATIM 2013-06-06 11:12  
 OBNUC 13C  
 EXMOD single\_pulse\_dec  
 OBFREQ 100.53 MHz  
 OBSSET 5.35 KHz  
 OBFIN 5.88 Hz  
 POINT 32756  
 FREQU 25188.52 Hz  
 SCANS 151  
 ACQTM 1.3009 sec  
 PD 1.0000 sec  
 PW1 3.17 usec  
 IRNUC 1H  
 CTEMP 23.2 c  
 SLVNT CDCL3  
 EXREF 77.00 ppm  
 BF 0.12 Hz  
 RGAIN 24

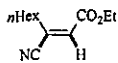

(E)-2c

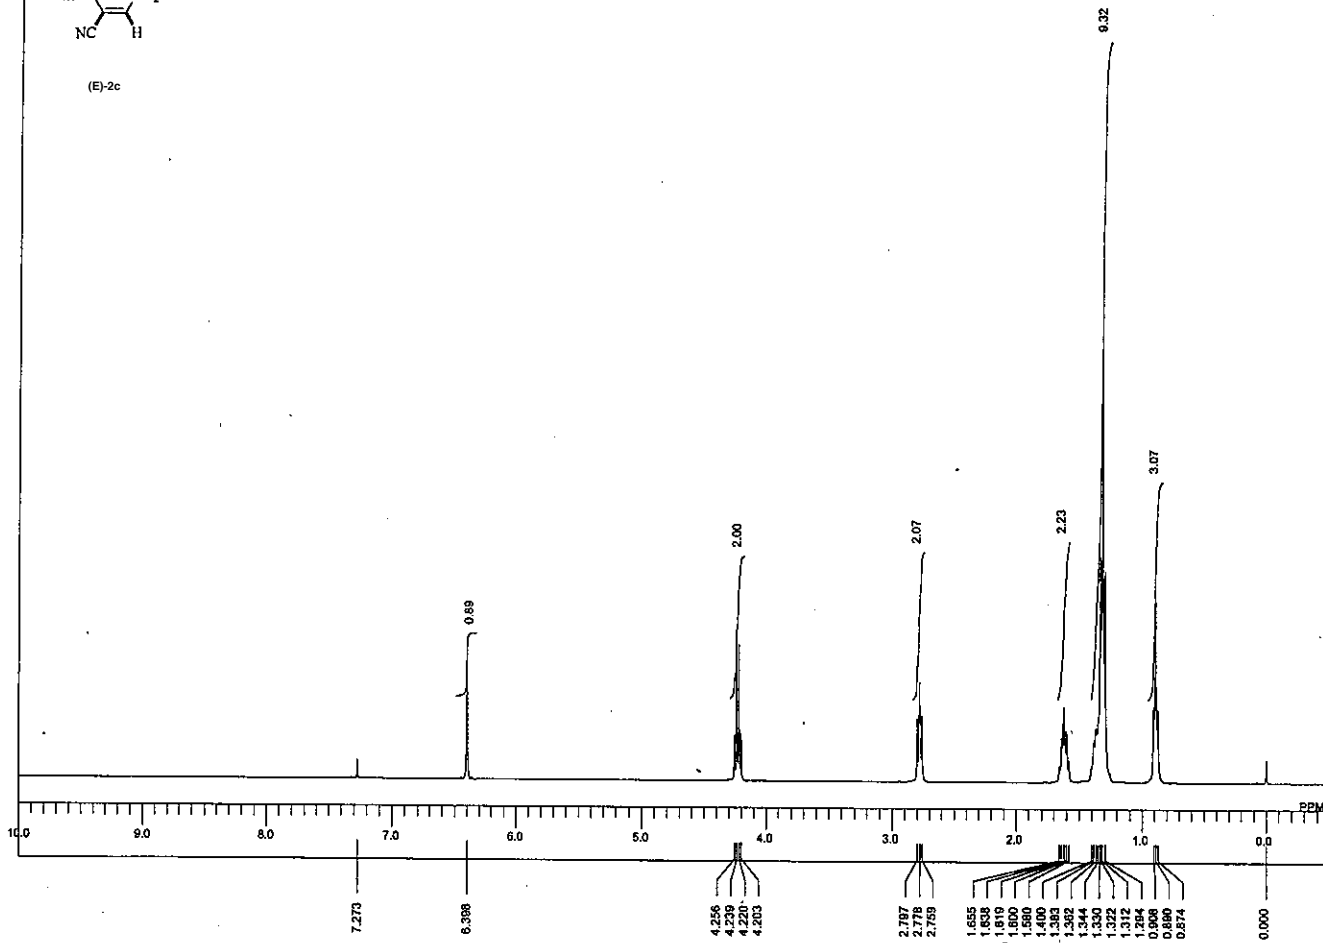

DFILE GSYXF01-77-Fr2  
 COMNT 2013-06-05 16:56  
 DATIM 1H  
 OBNUC single\_pulse\_exp  
 EXMOD 398.78 MHz  
 OBFRQ 4.19 KHz  
 OBSET 7.29 Hz  
 POINT 16384  
 FREQU 5998.80 Hz  
 SCANS 8  
 ACQTM 2.7312 sec  
 PD 2.0000 sec  
 PW1 6.00 usec  
 IRNUC  
 CTEMP 22.4 c  
 SLVNT CDCl3  
 EXREF 0.00 ppm  
 BF 1.00 Hz  
 RGAIN 9

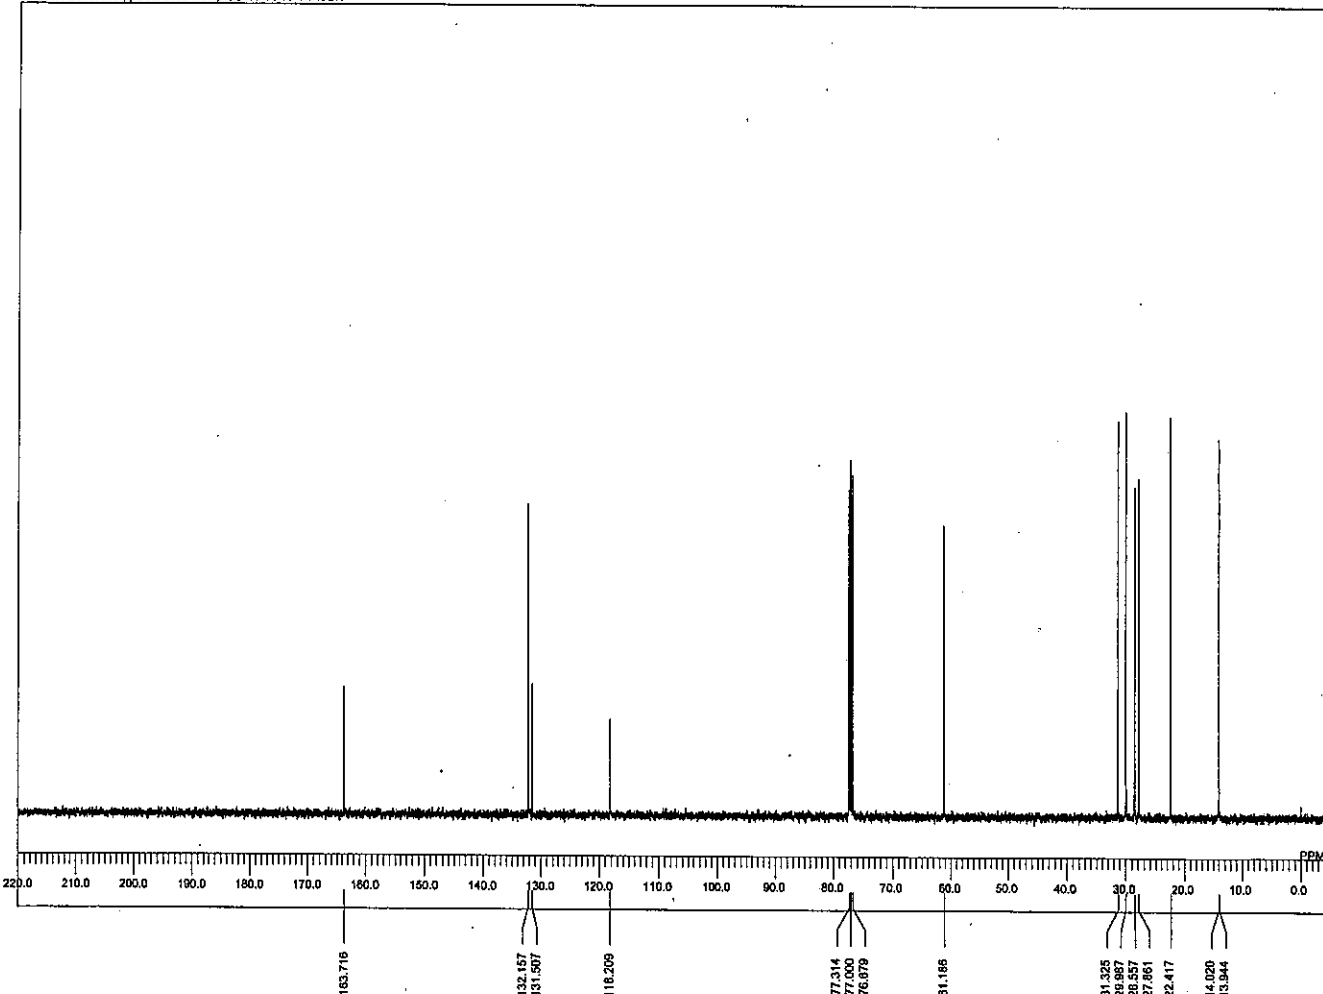

DFILE GSYXF01-77-TM  
 COMNT 2013-06-05 17:15  
 DATIM 13C  
 OBNUC single\_pulse\_dec  
 EXMOD 100.53 MHz  
 OBFRQ 5.35 KHz  
 OBSET 5.86 Hz  
 POINT 32768  
 FREQU 25189.82 Hz  
 SCANS 354  
 ACQTM 1.3009 sec  
 PD 1.0000 sec  
 PW1 3.17 usec  
 IRNUC 1H  
 CTEMP 23.5 c  
 SLVNT CDCl3  
 EXREF 77.00 ppm  
 BF 1.00 Hz  
 RGAIN 23



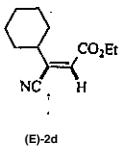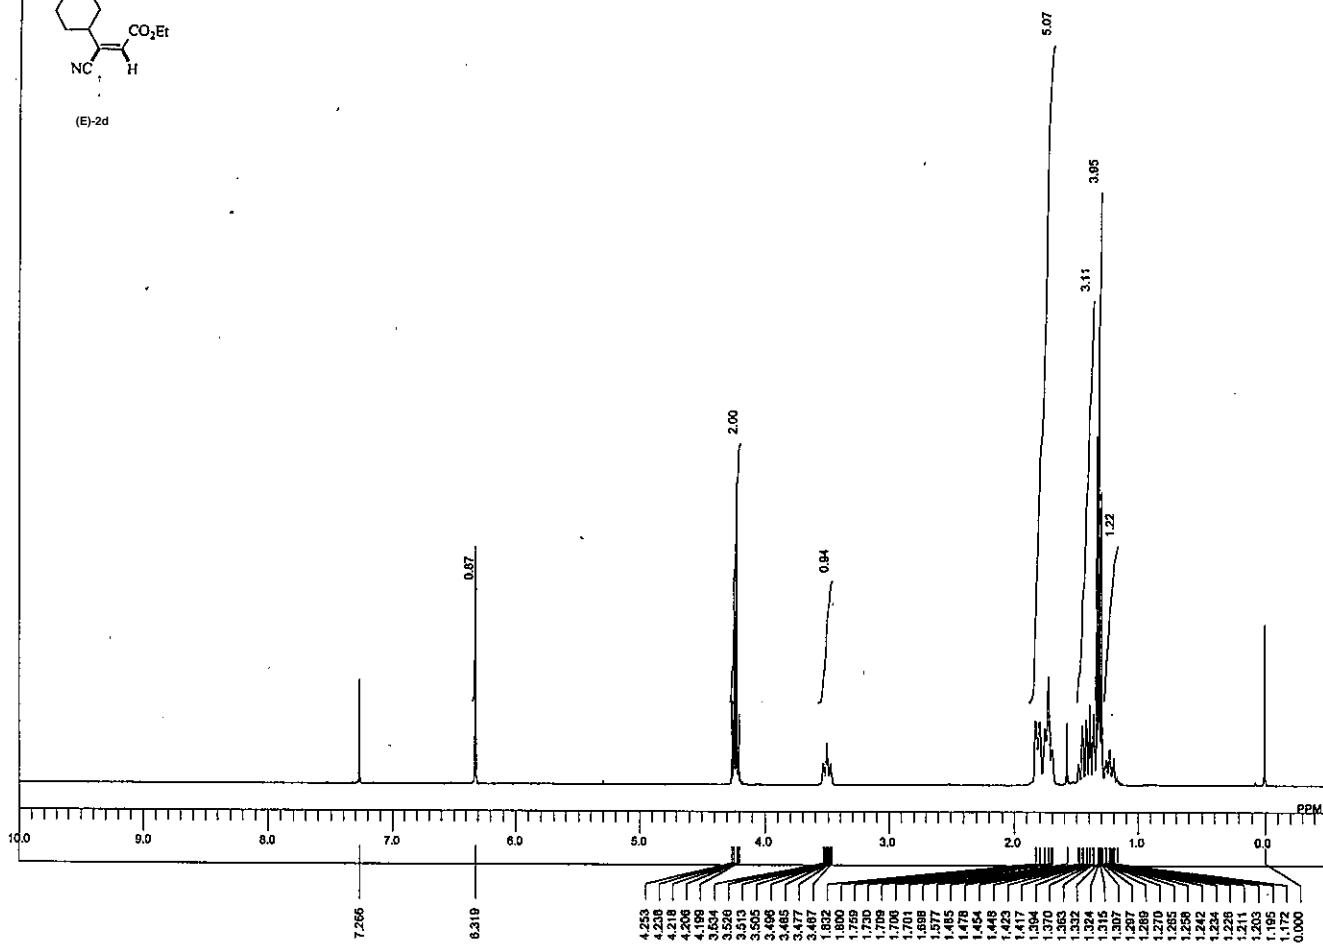

DFILE GSYXF02-16-  
 COMNT single\_pulse  
 DATIM 2013-06-12 18  
 OBNUC 1H  
 EXMCD proton.jcp  
 OBFRQ 399.76 MHz  
 OBSET 4.19 KHz  
 OBFIN 7.29 Hz  
 POINT 16384  
 FREQU 7503.00 Hz  
 SCANS 8  
 ACQTM 2.1837 sec  
 PD 5.0000 sec  
 PW1 5.01 usec  
 IRNUC 1H  
 CTEMP 23.9 c  
 SLVNT CDCL3  
 EXREF 0.00 ppm  
 BF 0.12 Hz  
 RGAIN 38

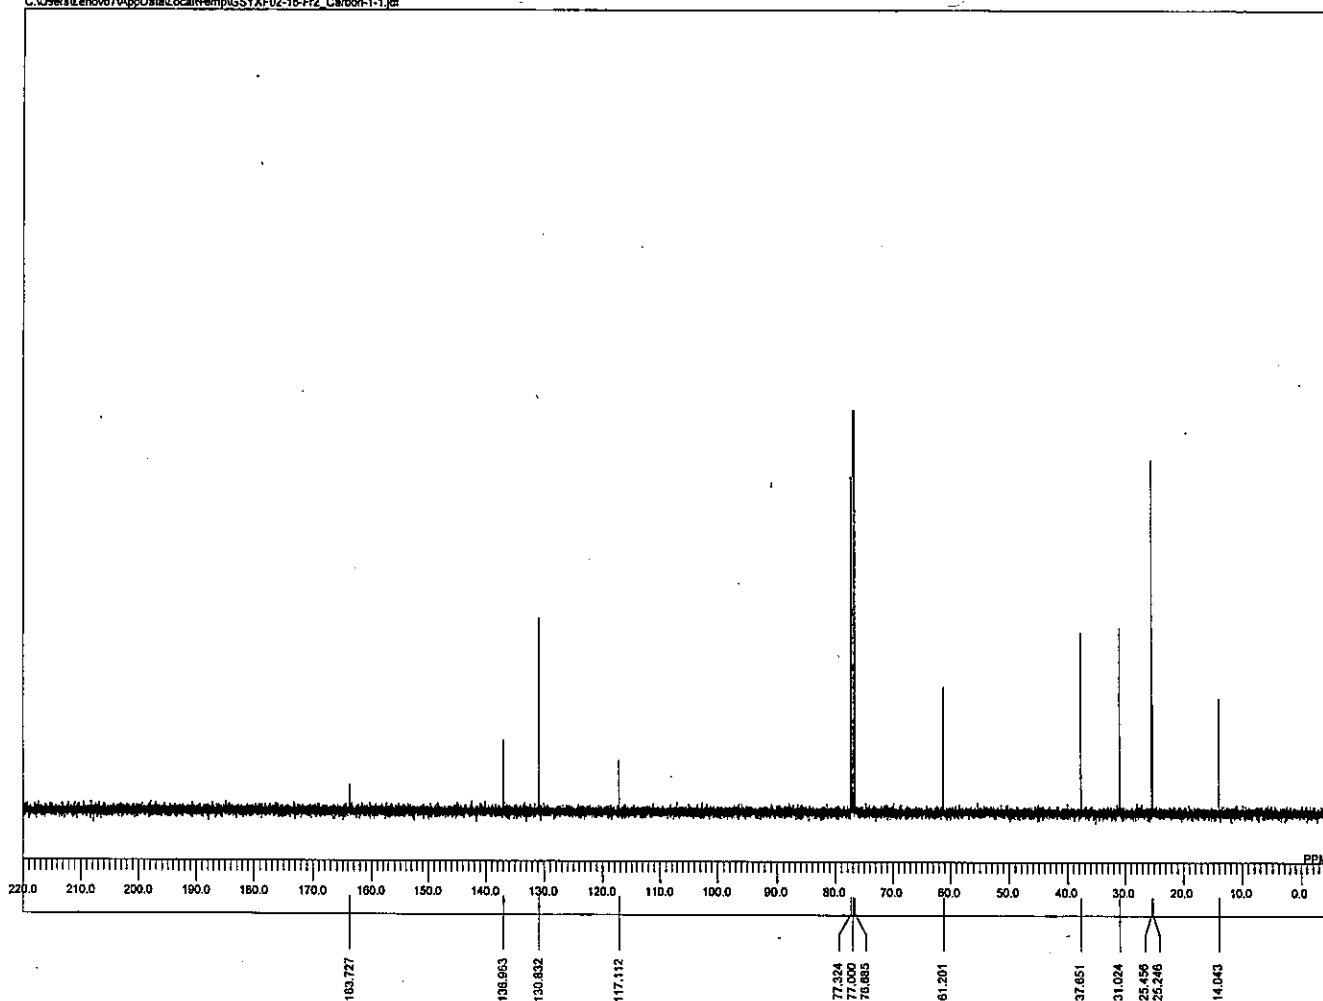

DFILE GSYXF02-16  
 COMNT single\_pulse d  
 DATIM 2013-06-12 11  
 OBNUC 13C  
 EXMCD carbon.jcp  
 OBFRQ 100.63 MHz  
 OBSET 5.35 KHz  
 OBFIN 5.85 Hz  
 POINT 32767  
 FREQU 31407.04 MHz  
 SCANS 169  
 ACQTM 1.0433 sec  
 PD 2.0000 sec  
 PW1 3.02 usec  
 IRNUC 13C  
 CTEMP 24.1 c  
 SLVNT CDCL3  
 EXREF 77.00 ppm  
 BF 0.12 Hz  
 RGAIN 50

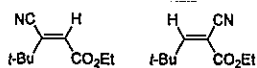

(E)-, and (Z)-2e (1.4:1)

DFILE gain-190202-P66-17-26\_Proton  
COMINT angle\_pulse  
DATEM 2019-02-02 11:06:36  
1H  
EXMOO proton\_jsp  
OBPRO 388.78 kHz  
OBSET 4.16 kHz  
OBPN 7.29 Hz  
POINT 13127  
FREQU 599.820 Hz  
SCANS 8  
ACQTM 2.1883 sec  
PD 8.0000 sec  
PWI 5.80 usec  
IRNUC 1H  
CTEMP 16.5 c  
SOLVT CDCl3  
EXREF 0.00 ppm  
BF 0.12 Hz  
RGAIN 38

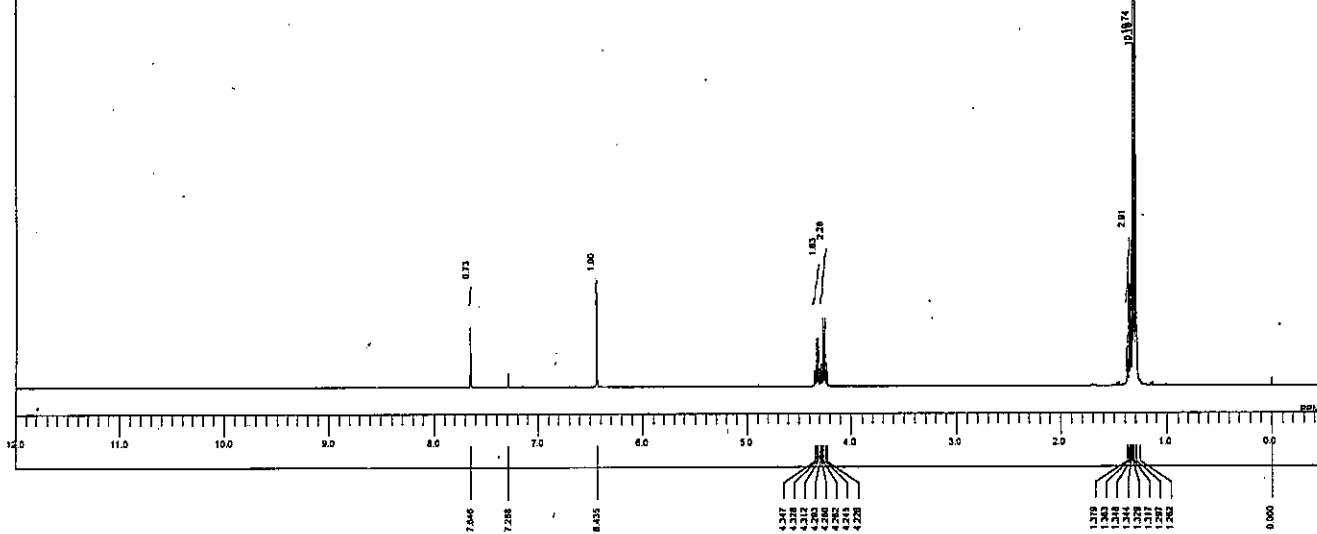

DFILE gain-190202-P66-17-26\_Carb  
COMINT single pulse decoupled gated  
DATEM 2019-02-02 11:12:49  
13C  
EXMOO carbon\_jsp  
OBPRO 100.53 MHz  
OBSET 5.35 kHz  
OBPN 5.86 Hz  
POINT 38214  
FREQU 25292.53 Hz  
SCANS 80  
ACQTM 1.0381 sec  
PD 2.0000 sec  
PWI -3.02 usec  
IRNUC 13C  
CTEMP 16.7 c  
SOLVT CDCl3  
EXREF 77.00 ppm  
BF 0.12 Hz  
RGAIN 50

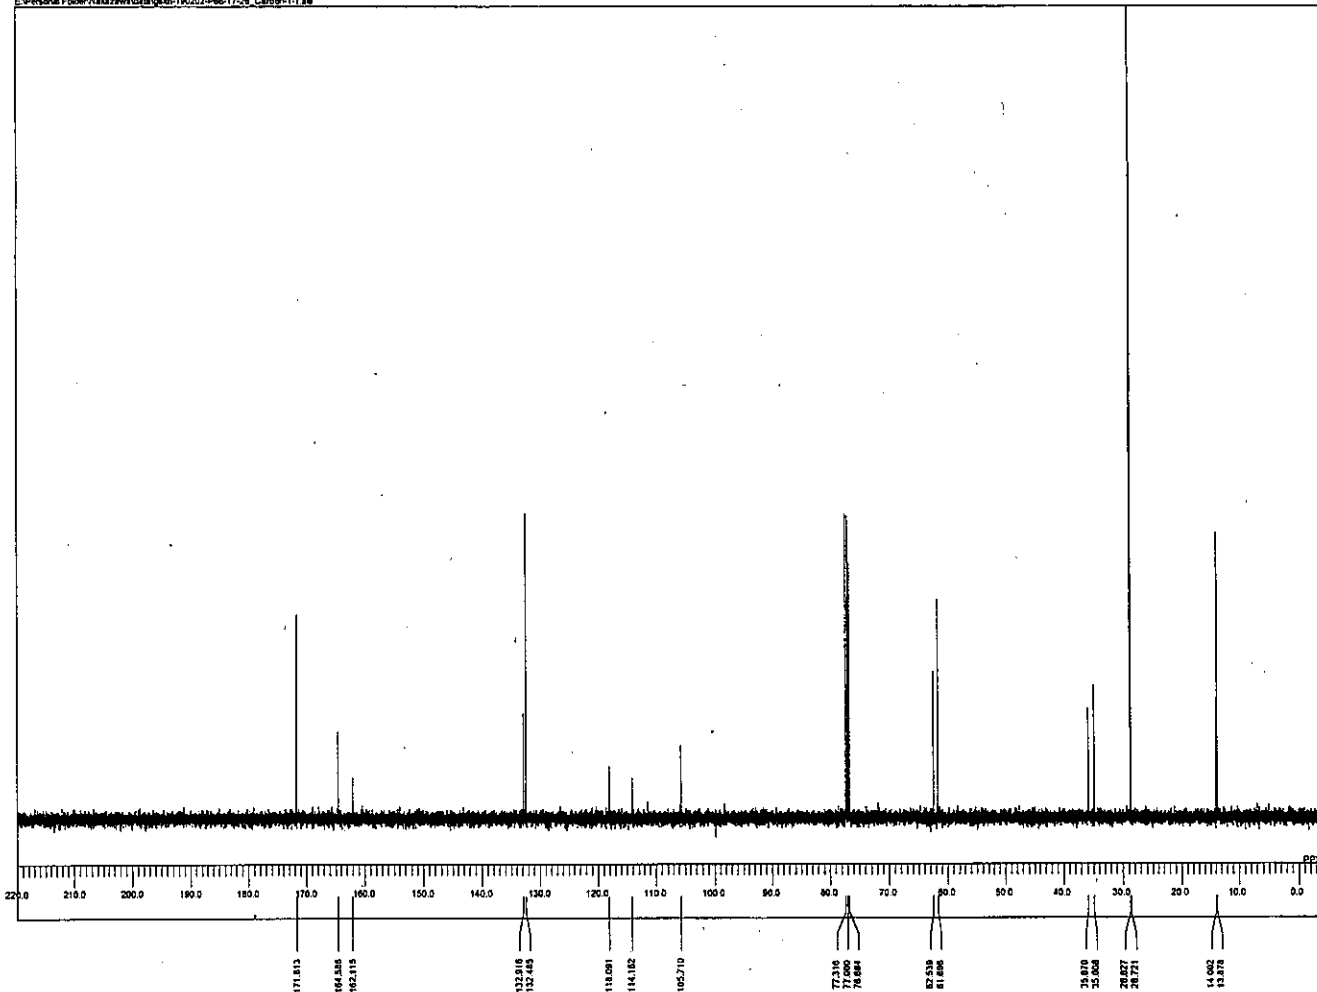

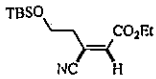

(E)-2f

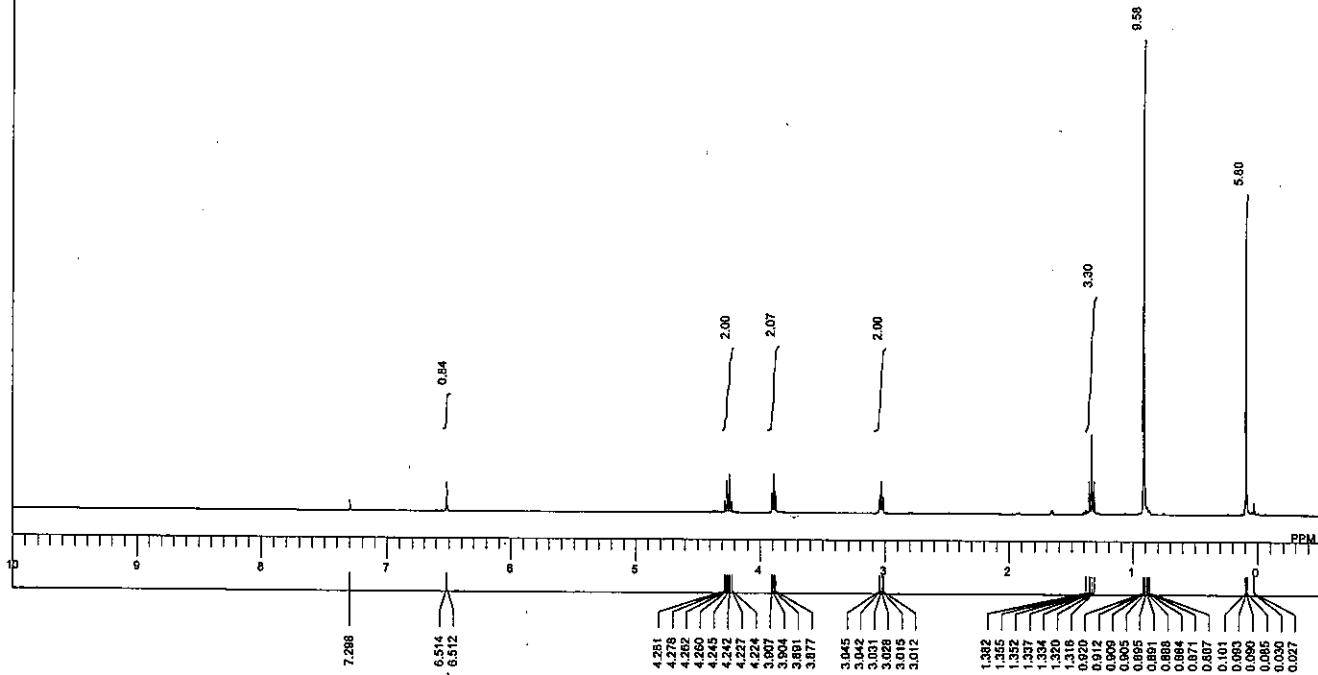

DFILE GSYXF01-73-Fr2  
 COMNT  
 DATIM 2013-06-03 10:43:  
 OBNUC 1H  
 EXMOD single\_pulse\_exp  
 OBFRQ 399.78 MHz  
 OBSFQ 4.18 KHz  
 OBSFM 7.29 Hz  
 POINT 16384  
 FREQU 5998.80 Hz  
 SCANS 8  
 ACQTM 2.7312 sec  
 PD 2.0000 sec  
 PW1 6.00 usec  
 IRNUC  
 CTEMP 23.0 c  
 SLVNT CDCL3  
 EXREF 0.00 ppm  
 BF 0.12 Hz  
 RGAIN 10

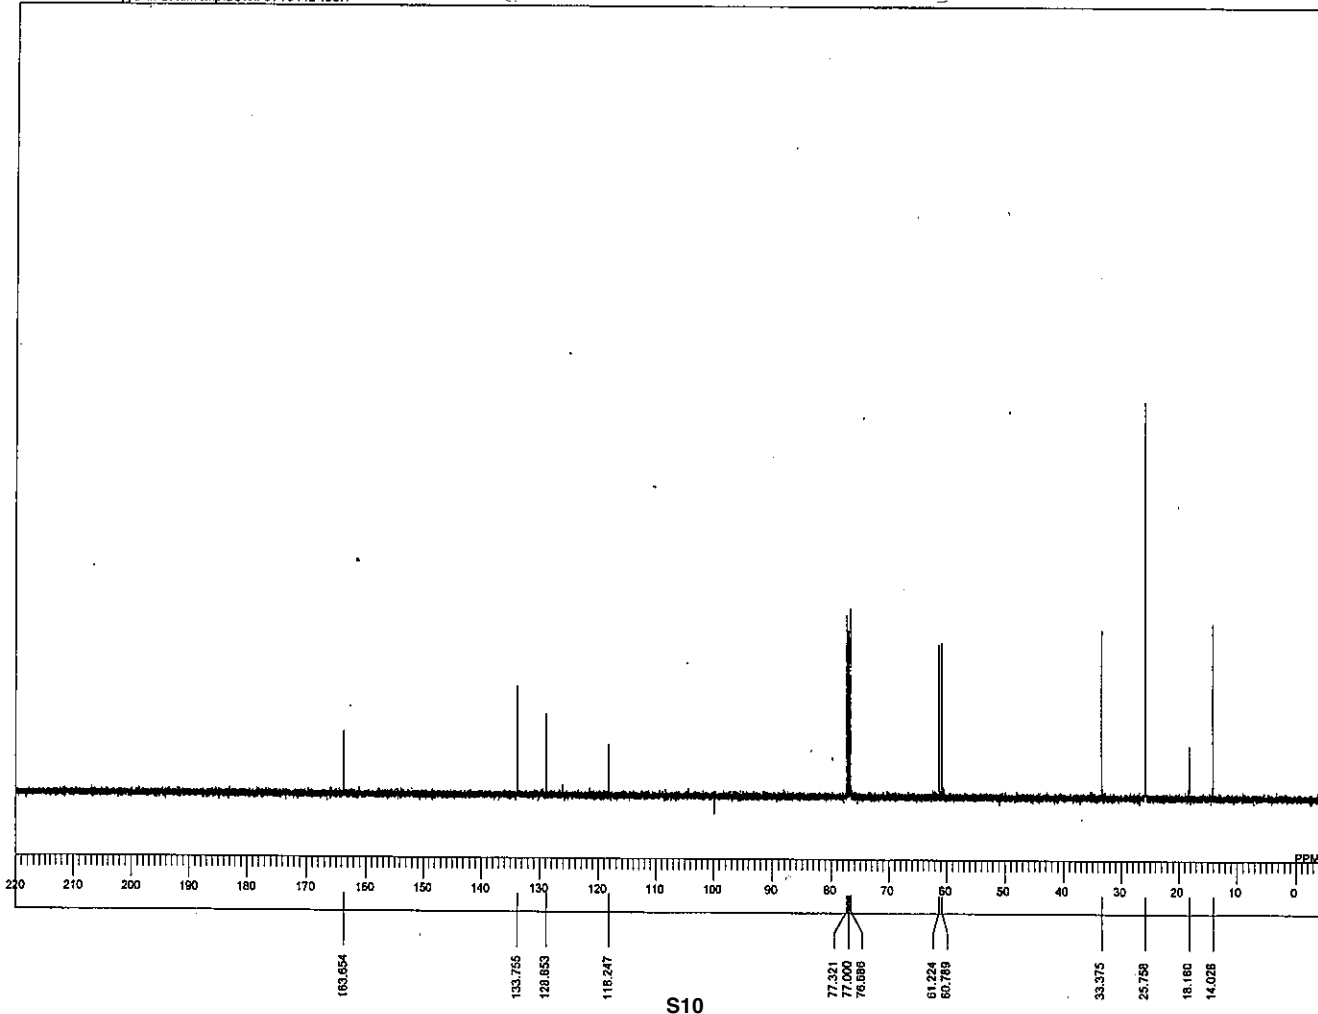

DFILE GSYXF01-73-Fr2  
 COMNT  
 DATIM 2013-06-03 11:01  
 OBNUC 13C  
 EXMOD single\_pulse\_dec  
 OBFRQ 100.53 MHz  
 OBSFQ 5.36 KHz  
 OBSFM 5.85 Hz  
 POINT 32768  
 FREQU 25188.92 Hz  
 SCANS 289  
 ACQTM 1.3009 sec  
 PD 1.0000 sec  
 PW1 3.17 usec  
 IRNUC 1H  
 CTEMP 24.1 c  
 SLVNT CDCL3  
 EXREF 77.00 ppm  
 BF 0.12 Hz  
 RGAIN 24

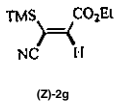

DFILE GSYXF02-05.1  
 COMNT 2013-08-08 09:23  
 DATIM 1H  
 OBNUC single\_pulse.exp  
 EXMOD 399.78 MHz  
 OFPRQ 4.19 KHz  
 OBSET 7.28 Hz  
 OFBIN 16384  
 POINT 5998.80 Hz  
 FREQU 8  
 SCANS 2.7312 sec  
 ACQTM 2.0000 sec  
 PD 6.00 usec  
 PWI 22.2 c  
 IRNUC CDCL3  
 CTEMP 0.00 ppm  
 SLVNT 0.12 Hz  
 EXREF 15  
 BF  
 RGAIN

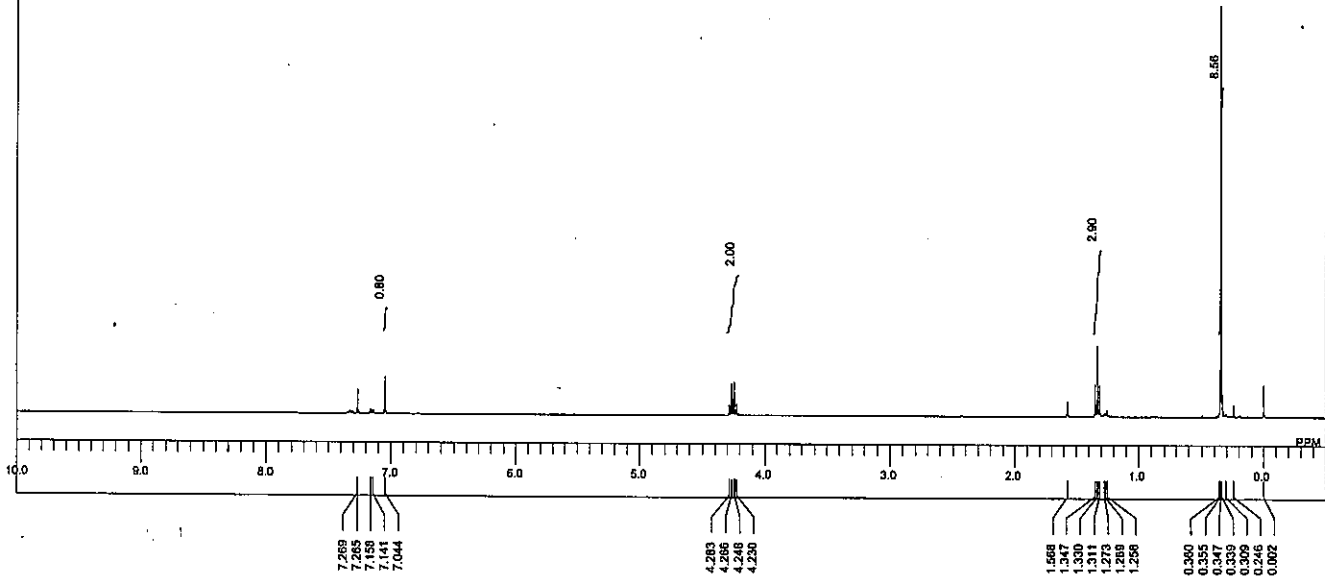

DFILE GSYXF02-05TM1  
 COMNT 2013-06-08 15:05  
 DATIM 13C  
 OBNUC single\_pulse\_dec  
 EXMOD 100.63 MHz  
 OFPRQ 5.35 KHz  
 OBSET 5.85 Hz  
 OFBIN 32768  
 POINT 25188.92 Hz  
 FREQU 1535  
 SCANS 1.3009 sec  
 ACQTM 1.0000 sec  
 PD 3.17 usec  
 PWI 23.7 c  
 IRNUC CDCL3  
 CTEMP 77.00 ppm  
 SLVNT 0.12 Hz  
 EXREF 24  
 BF  
 RGAIN

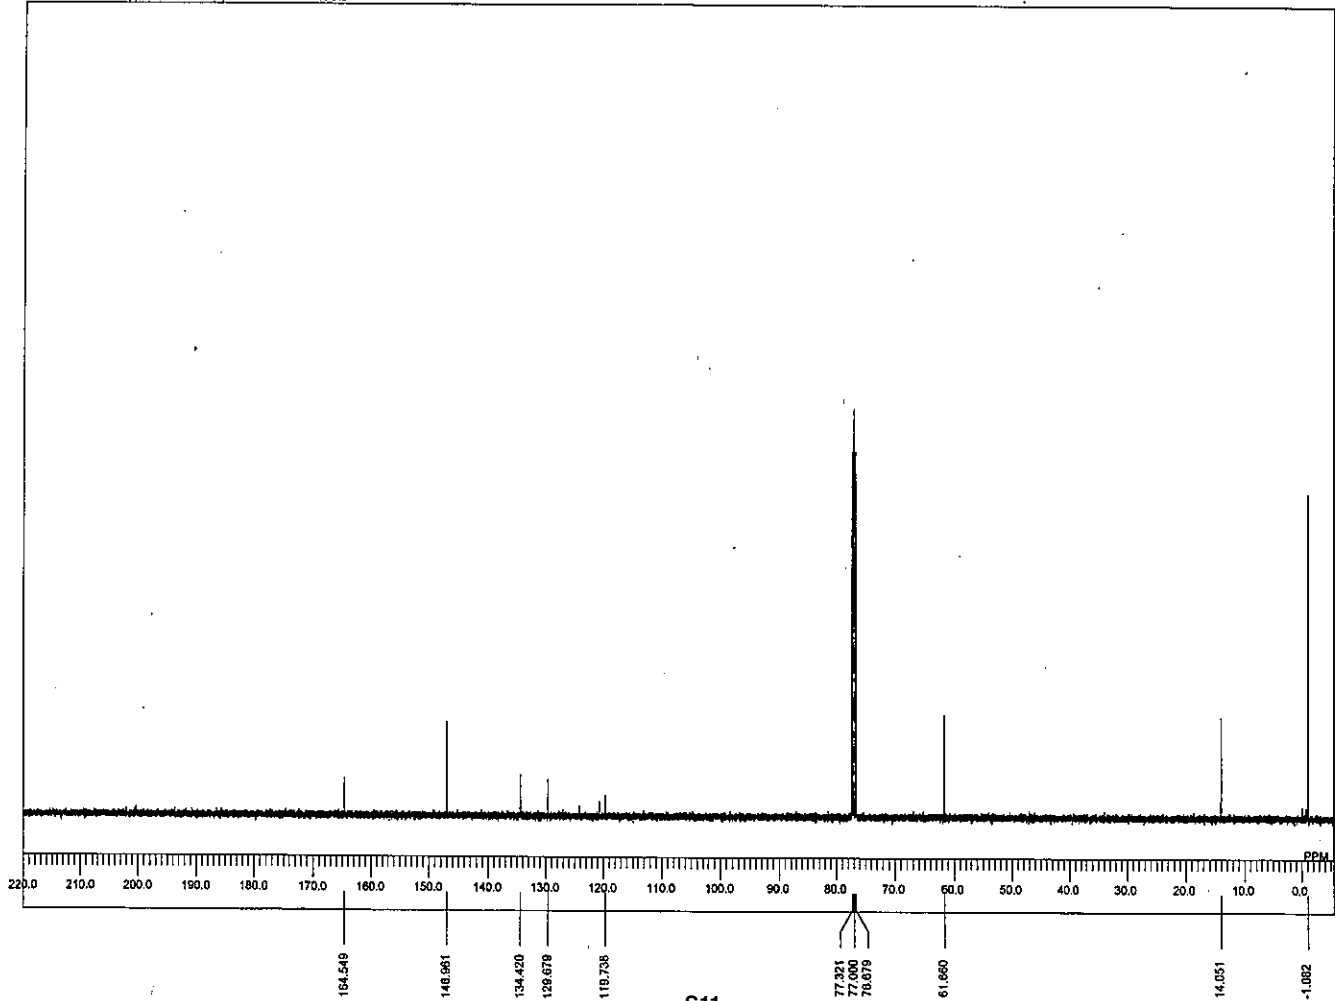

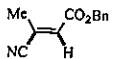

(E)-2h

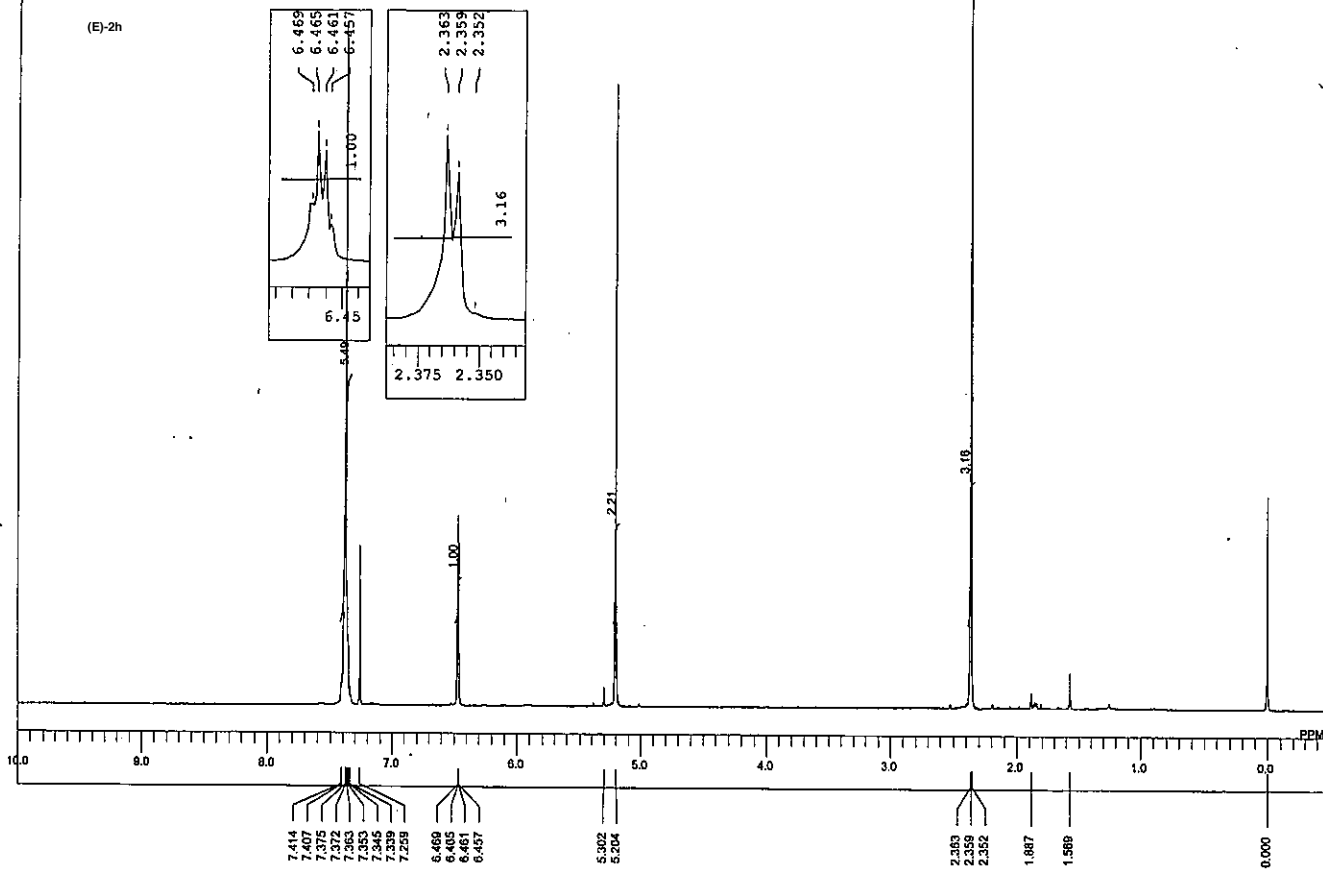

DFILE GSYXF01-04-Fr2  
 COMNT single\_pulse  
 DATIM 2013-04-11 14:33  
 OBNUC 1H  
 EXMOD proton.jpg  
 OBFREQ 399.76 MHz  
 OBSSET 4.19 KHz  
 OBFIN 7.29 Hz  
 POINT 20480  
 FREQU 8378.75 Hz  
 SCANS 8  
 ACQTM 2.1837 sec  
 PD 5.0000 sec  
 PWT 5.00 usec  
 IRNUC 1H  
 CTEMP 18.1 c  
 SLVNT CDCL3  
 EXREF 0.00 ppm  
 BF 0.12 Hz  
 RGAIN 44

single pulse decoupled gated NMR

C:\Users\Lenovo\TVAppData\LocalTemp\GSYXF-Me,Bn,HCN\_Carbon\_8-1-11.d

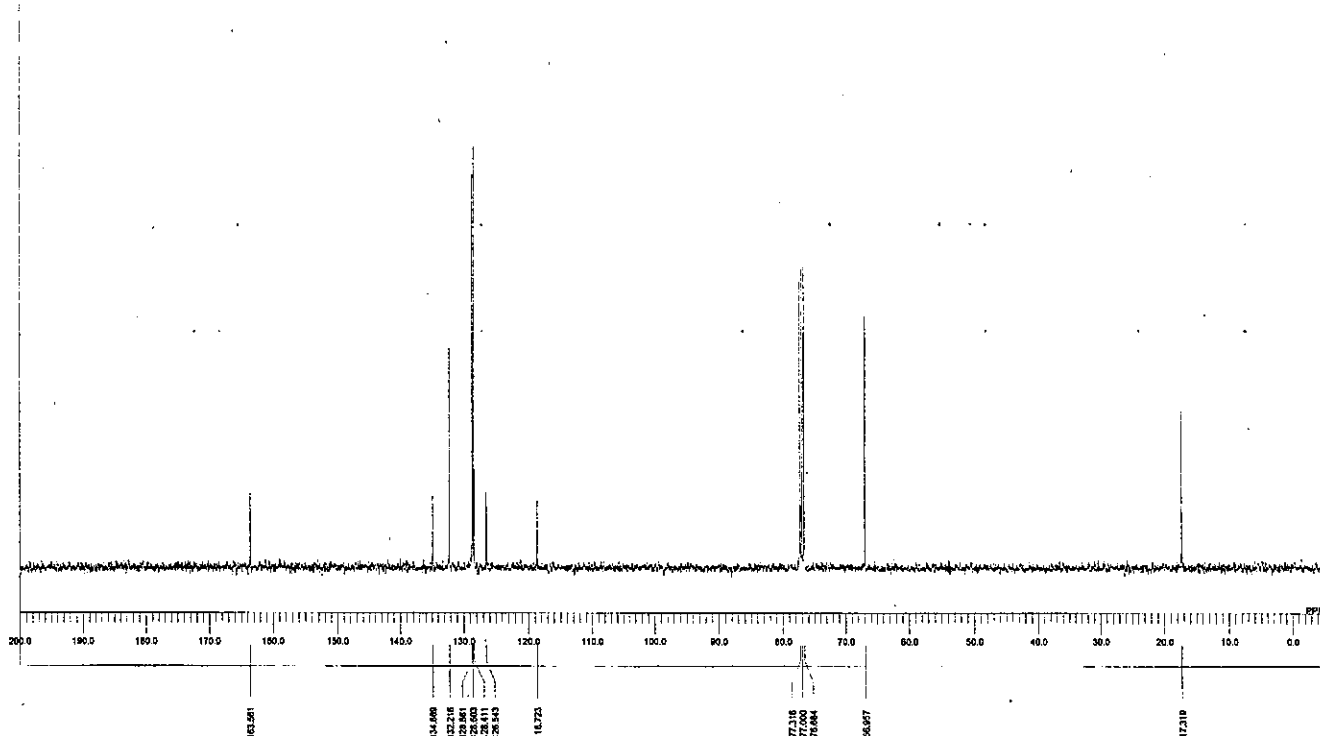

DFILE GSYXF-Me,Bn,HCN\_C  
 COMNT single pulse decoupled  
 DATIM 2016-01-15 16:18:08  
 OBNUC 13C  
 EXMOD carbon.jpg  
 OBFREQ 100.53 MHz  
 OBSSET 5.35 KHz  
 OBFIN 3.88 Hz  
 POINT 40960  
 FREQU 39457.07 Hz  
 SCANS 87  
 ACQTM 1.0381 sec  
 PD 2.0000 sec  
 PWT 3.52 usec  
 IRNUC 13C  
 CTEMP 18.4 c  
 SLVNT CDCL3  
 EXREF 77.00 ppm  
 BF 0.12 Hz  
 RGAIN 50

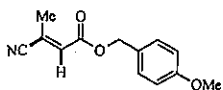

(E)-2i

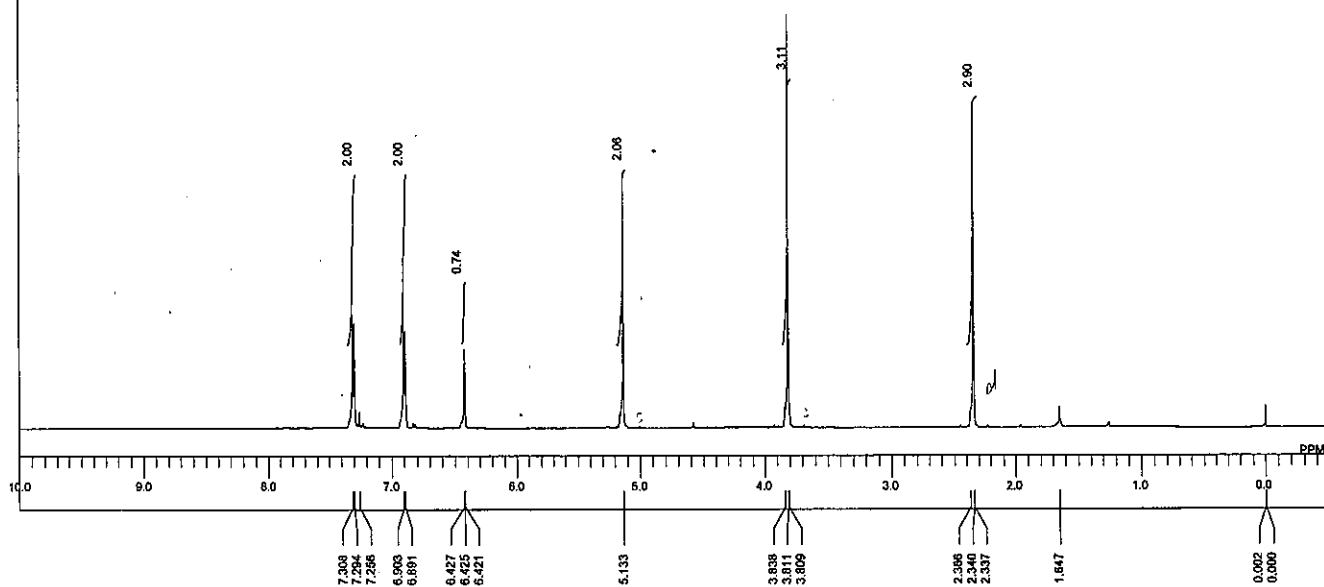

DFILE GSYXF01-52-MeC  
 COMNT single\_pulse  
 DATIM 2013-05-29 19:02:  
 OBNUC <sup>1</sup>H  
 EXMOD proton.jcp  
 OBFRQ 600.17 MHz  
 OBSET 5.30 KHz  
 OBFIN 5.47 Hz  
 POINT 20480  
 FREQU 14079.58 Hz  
 SCANS 8  
 ACQTM 1.4549 sec  
 PD 5.0000 sec  
 PW1 6.55 usec  
 IRNUC <sup>1</sup>H  
 CTEMP 22.9 c  
 SLVNT CDCL3  
 EXREF 0.00 ppm  
 BF 0.12 Hz  
 RGAIN 34

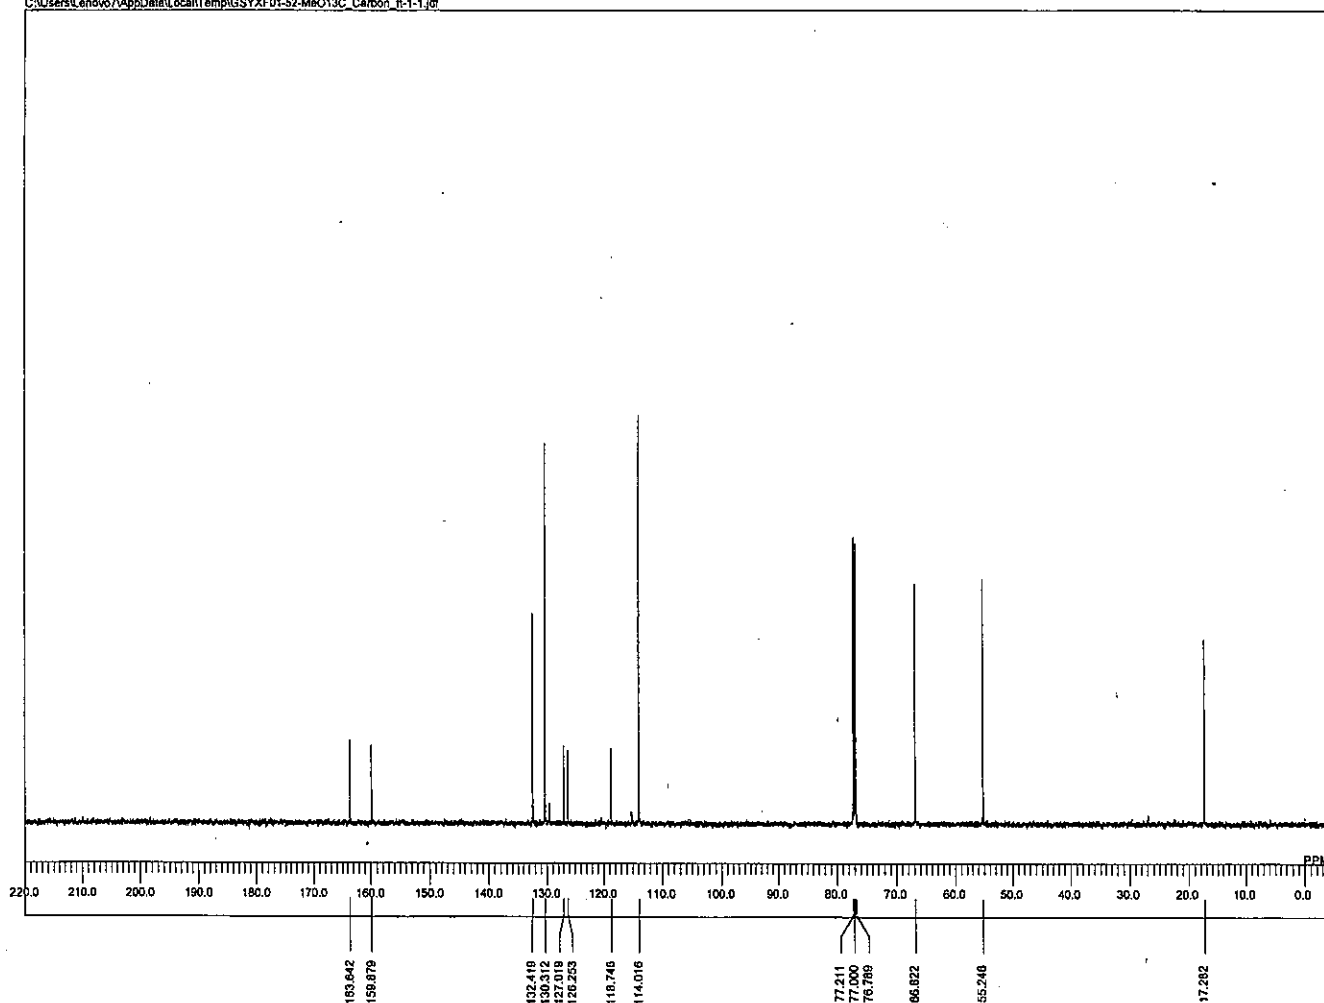

DFILE GSYXF01-52-MeC  
 COMNT single\_pulse deco  
 DATIM 2013-05-29 19:04  
 OBNUC <sup>13</sup>C  
 EXMOD carbon.jcp  
 OBFRQ 150.92 MHz  
 OBSET 6.52 KHz  
 OBFIN 1.74 Hz  
 POINT 40960  
 FREQU 59185.50 Hz  
 SCANS 132  
 ACQTM 0.6921 sec  
 PD 2.0000 sec  
 PW1 3.27 usec  
 IRNUC <sup>1</sup>H  
 CTEMP 23.7 c  
 SLVNT CDCL3  
 EXREF 77.00 ppm  
 BF 0.12 Hz  
 RGAIN 50

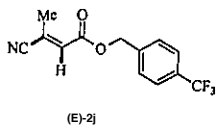

DFILE GSYXF01-59-CF31  
COMNT single\_pulse  
DATIM 2013-05-29 19:11:3  
OBNUC 1H  
EXMOD proton.jxp  
OBFRQ 600.17 MHz  
OBSET 5.30 KHz  
OBFIN 5.47 Hz  
POINT 20480  
FREQU 14078.58 Hz  
SCANS 8  
ACQTM 1.4349 sec  
PD 5.0000 sec  
PWI 6.55 usec  
IRNUC 1H  
CTEMP 23.0 c  
SLVNT CDCL3  
EXREF 0.00 ppm  
BF 0.12 Hz  
RGAIN 36

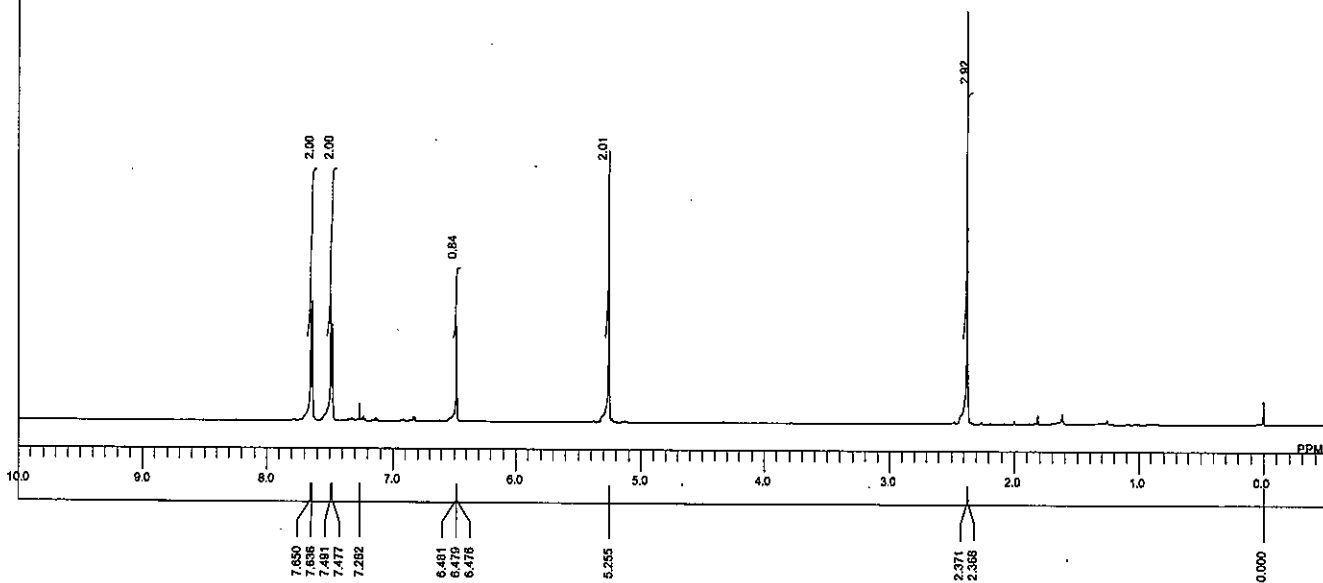

DFILE GSYXF01-59-CF  
COMNT single\_pulse\_deca  
DATIM 2013-05-29 19:12  
OBNUC 13C  
EXMOD carbon.jxp  
OBFRQ 150.92 MHz  
OBSET 8.52 KHz  
OBFIN 1.74 Hz  
POINT 40960  
FREQU 59185.80 Hz  
SCANS 161  
ACQTM 0.6921 sec  
PD 2.0000 sec  
PWI 3.27 usec  
IRNUC 1H  
CTEMP 23.8 c  
SLVNT CDCL3  
EXREF 77.00 ppm  
BF 0.12 Hz  
RGAIN 50

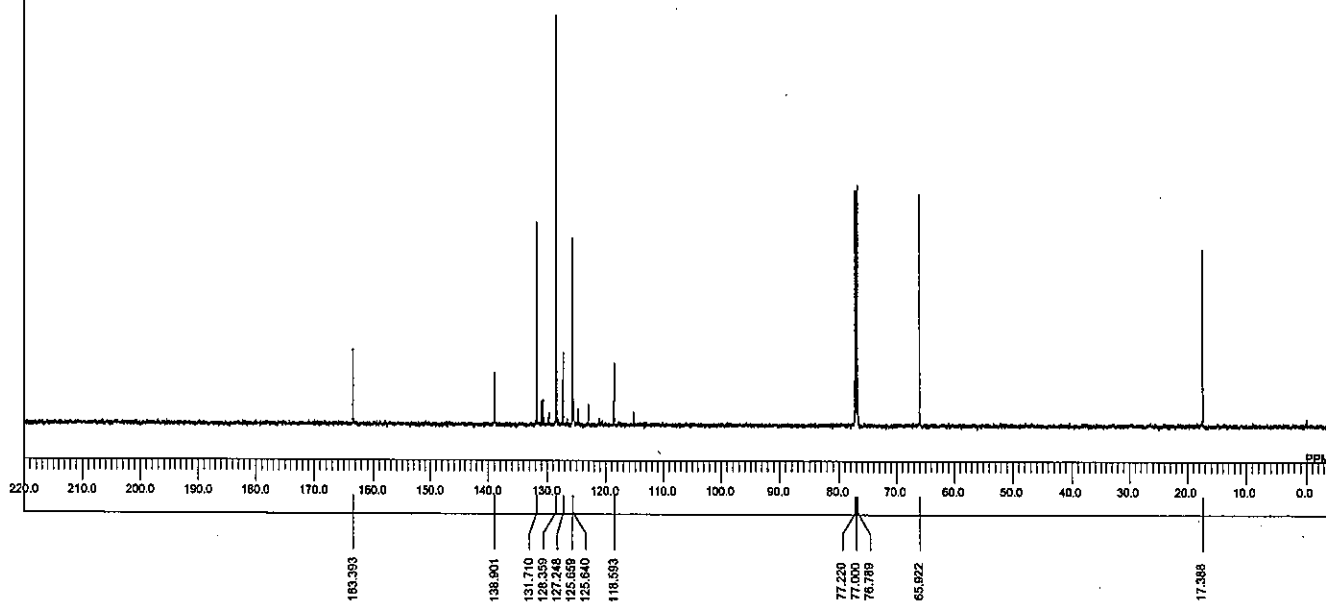

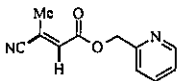

(E)-2k

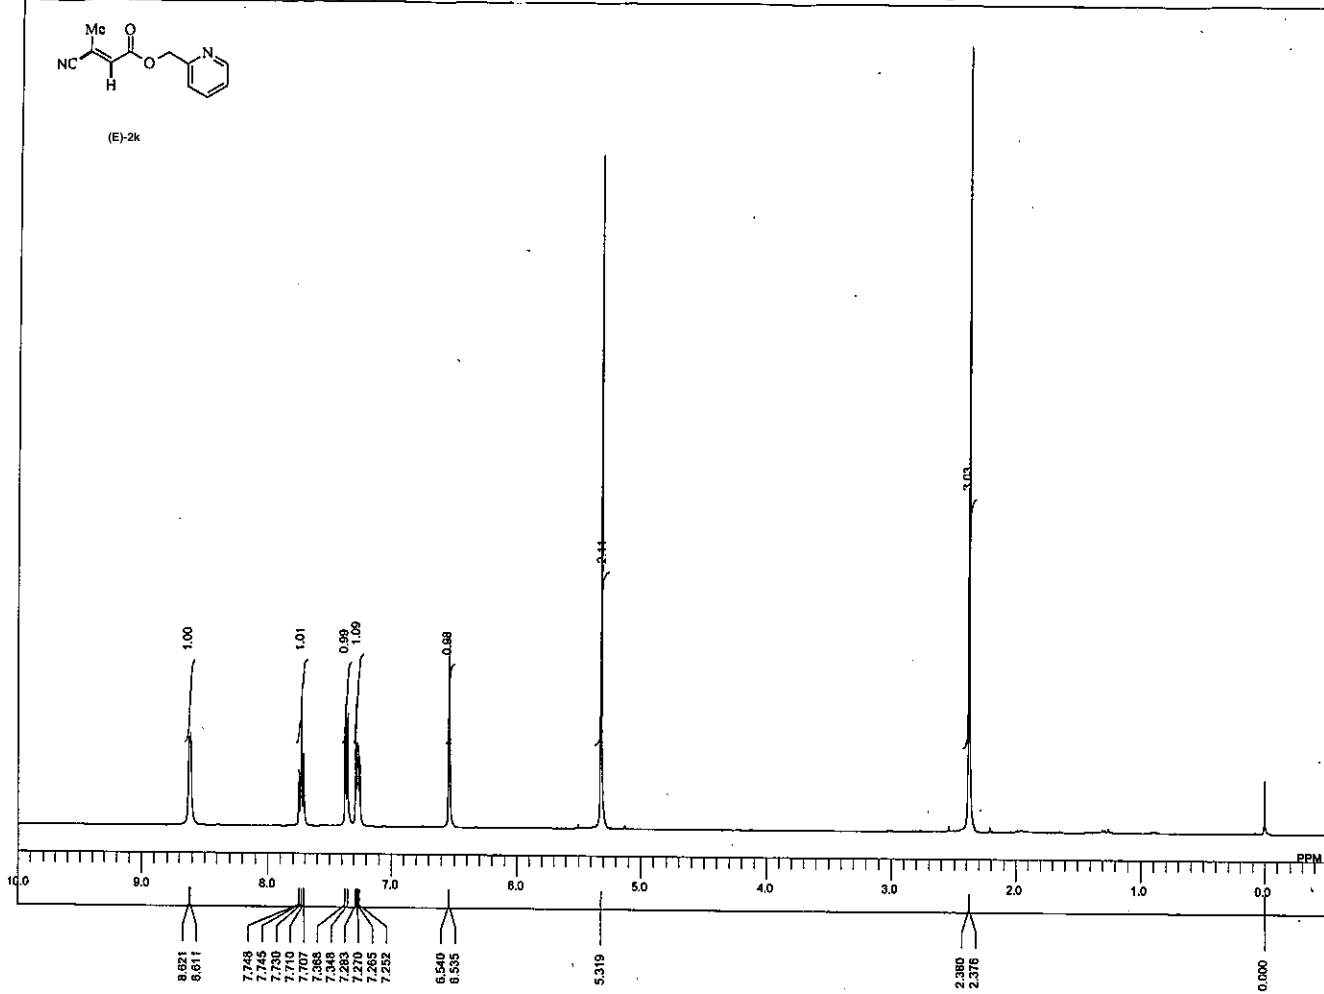

DFILE GSYXF08-59\_Pr  
 COMNT single\_pulse  
 DATIM 2013-03-06 10:58  
 OBNUC 1H  
 EXMOD proton.jxp  
 OBFRO 399.78 MHz  
 OBSF7 4.19 KHz  
 OBSF1 7.29 Hz  
 POINT 20480  
 FREQU 9378.75 Hz  
 SCANS 16  
 ACQTM 2.1837 sec  
 PD 5.0000 sec  
 PWH 5.00 usec  
 IRNUC 1H  
 CTEMP 22.8 c  
 SLVNT CDCL3  
 EXREF 0.00 ppm  
 BF 0.12 Hz  
 RGAIN 36

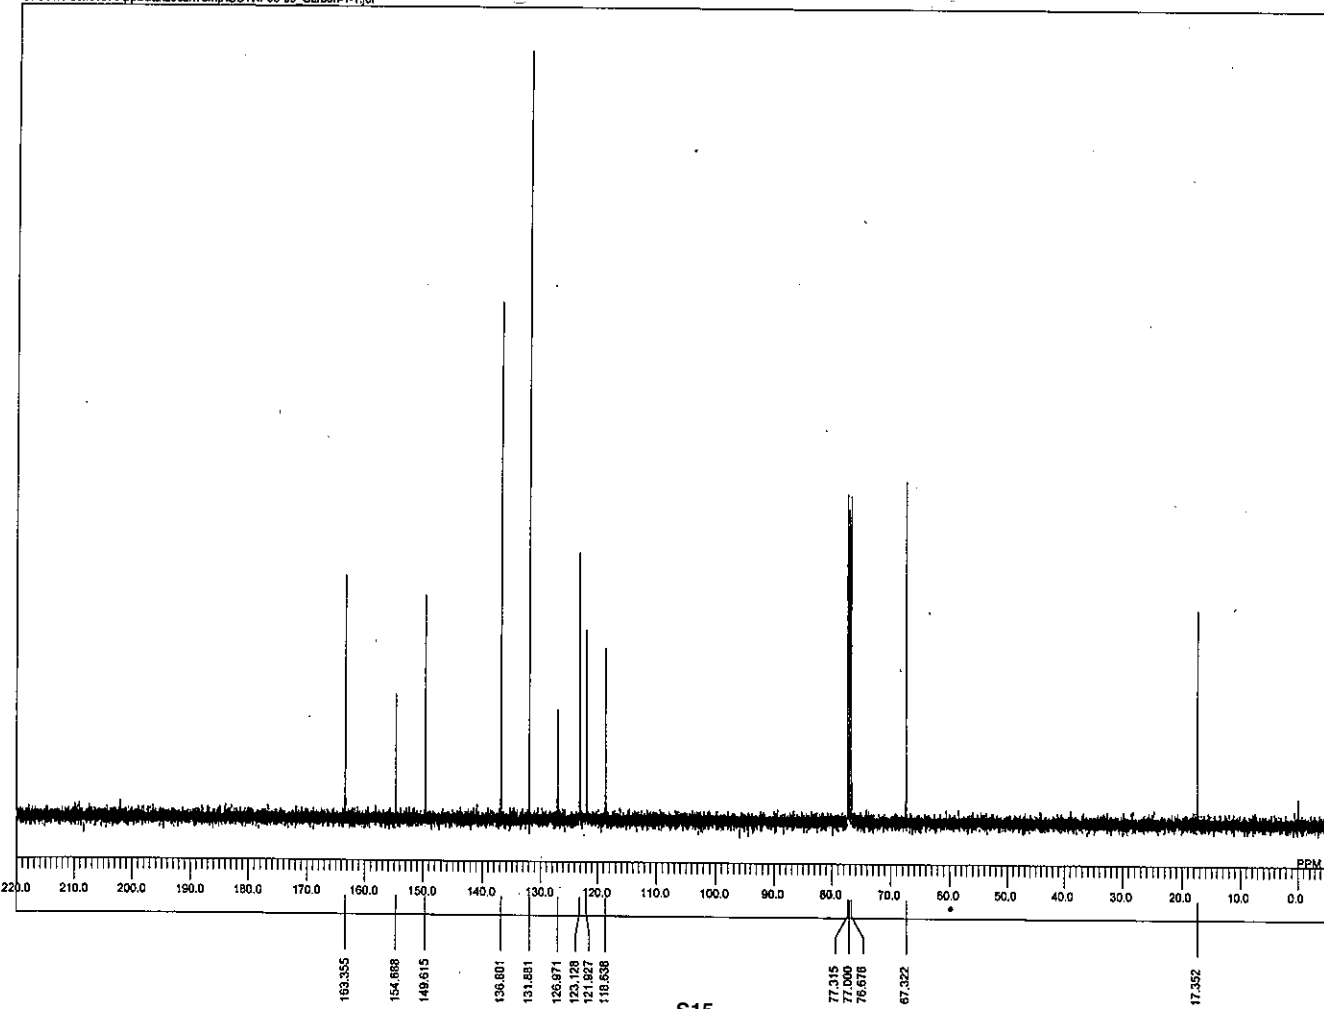

DFILE GSYXF08-59\_Car  
 COMNT single\_pulse\_decou  
 DATIM 2013-03-06 11:01  
 OBNUC 13C  
 EXMOD carbon.jxp  
 OBFRO 100.63 MHz  
 OBSF7 5.35 KHz  
 OBSF1 5.86 Hz  
 POINT 32767  
 FREQU 31407.04 Hz  
 SCANS 181  
 ACQTM 1.0433 sec  
 PD 2.0000 sec  
 PWH 3.07 usec  
 IRNUC 1H  
 CTEMP 23.1 c  
 SLVNT CDCL3  
 EXREF 77.00 ppm  
 BF 0.12 Hz  
 RGAIN 50



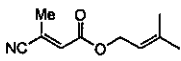

(E)-21

DFILE gdn-181221-P40-9\_Proton-1-  
 COUNT single\_pulse  
 DATUM 2016-12-21 17:04:28  
 OBNUC 1H  
 EXMODE proton3d  
 OBPRO 399.76 MHz  
 OBSET 4.18 KHz  
 OBPN 7.28 Hz  
 POINT 13157  
 FREQU 6002.40 Hz  
 SCANS 8  
 ACQTM 2.1837 sec  
 PD 5.0000 sec  
 PWT 9.05 usec  
 RVUC 1H  
 CTEMP 18.8 c  
 SLVNT CDCL3  
 EXREF 0.00 ppm  
 BF 0.12 Hz  
 RGAIN 44

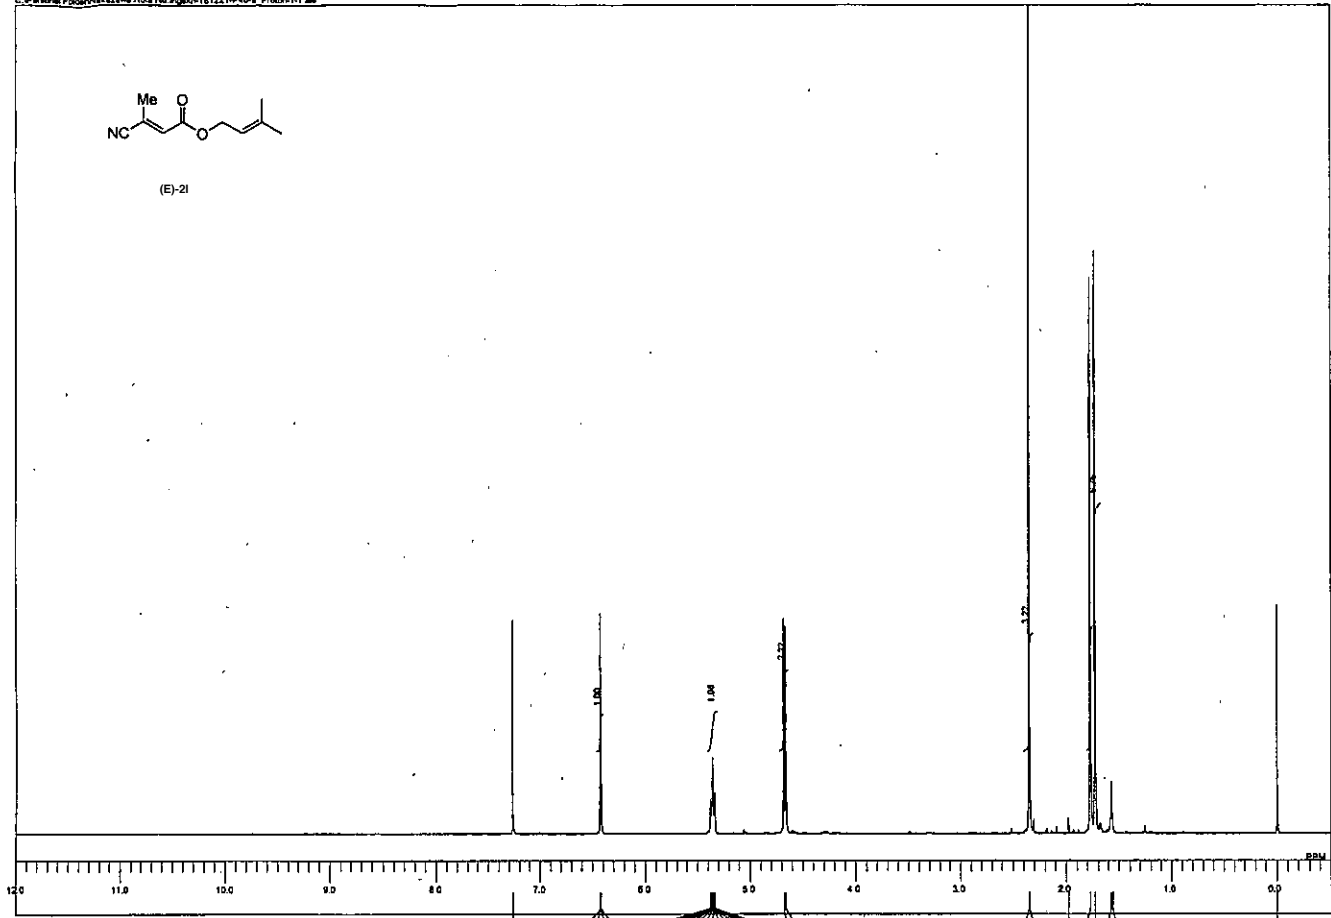

7.26  
 6.427  
 6.416  
 6.415  
 6.415  
 5.378  
 5.374  
 5.370  
 5.365  
 5.365  
 5.359  
 5.359  
 5.348  
 5.348  
 5.340  
 5.337  
 5.330  
 5.330  
 4.898  
 4.898  
 2.34  
 2.35  
 1.961  
 1.777  
 1.771  
 1.577  
 1.580  
 0.000

DFILE gdn-181227-gm1HCN\_Car  
 COMNT single pulse decoupled gated f  
 DATUM 2016-12-27 15:00:07  
 OBNUC 13C  
 EXMODE carbon1p  
 OBPRO 100.63 MHz  
 OBSET 5.35 KHz  
 OBPN 5.66 Hz  
 POINT 2614  
 FREQU 25252.53 Hz  
 SCANS 108  
 ACQTM 1.0281 sec  
 PD 2.0000 sec  
 PWT 3.33 usec  
 RVUC 1H  
 CTEMP 18.3 c  
 SLVNT CDCL3  
 EXREF 77.00 ppm  
 BF 0.12 Hz  
 RGAIN 80

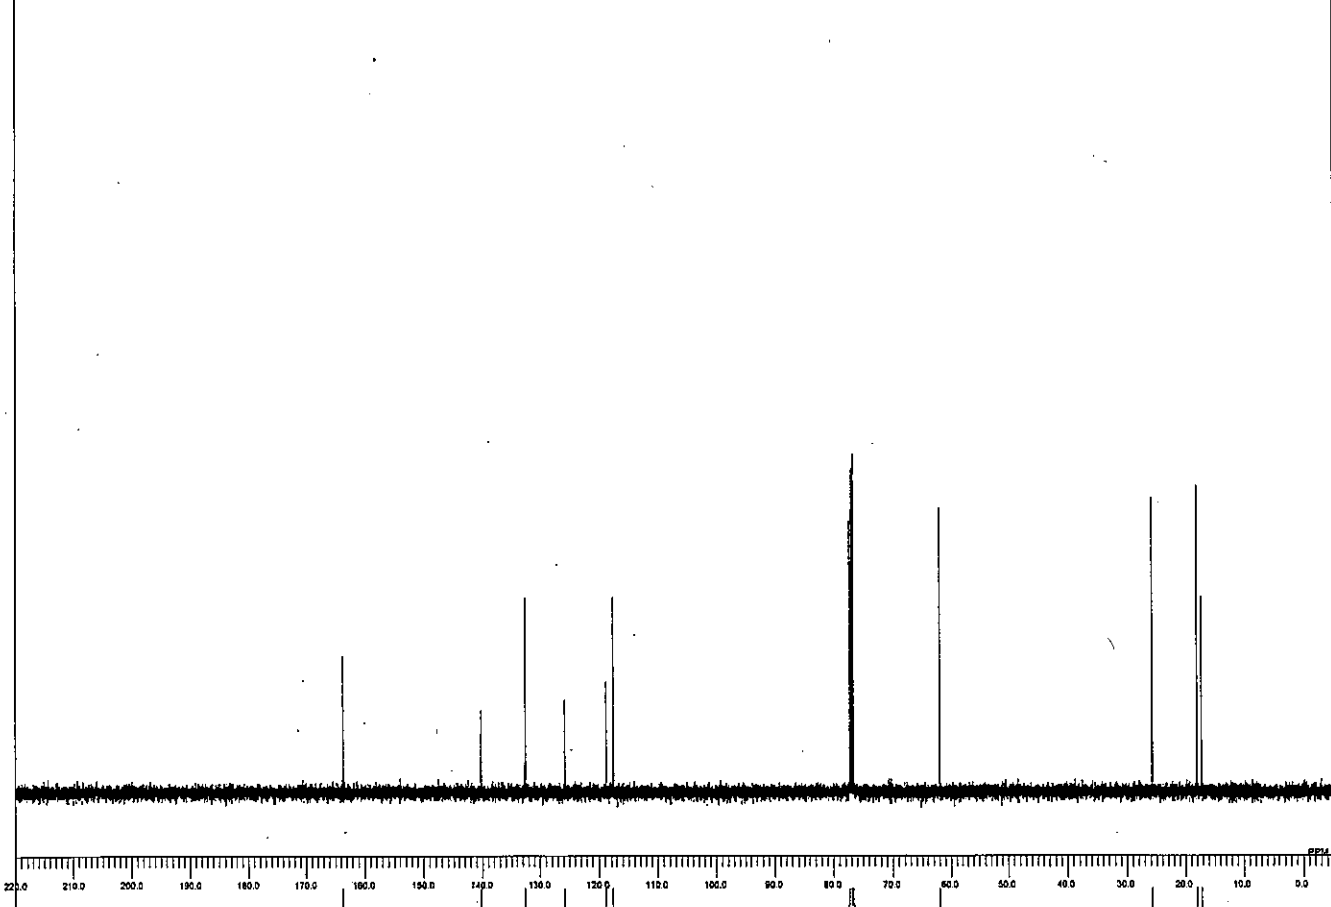

143.611  
 140.335  
 132.607  
 122.463  
 119.846  
 117.031  
 77.000  
 76.004  
 61.993  
 25.741  
 18.037  
 17.232

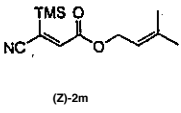

OF1E gln-190214-TMSPre-CN\_Pr  
COMINT sample\_1466  
DATM 2018-02-14 19:55:07  
OBNUC 1H  
EZMOD proton [ppm]  
OSPRQ 300.78 MHz  
OBSET 4.19 KHz  
OBPN 7.29 Hz  
POINT 13107  
FREQU 5992.20 Hz  
SCANS 8  
ACQTM 2.1863 sec  
PD 5.0000 sec  
PWI 5.60 usec  
IRNUC 1H  
CTEMP 16.7 c  
SLVNT CDCL3  
EXREF 0.00 ppm  
BF 0.12 Hz  
RGAIN 45

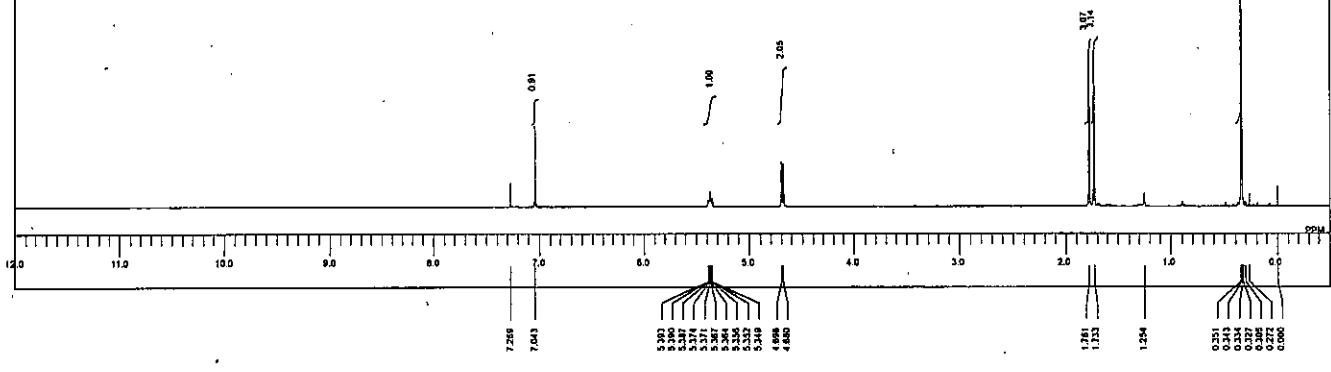

OF1E gln-190214-TMSPre-CN\_Ca  
COMINT single pulse decoupled gated 1  
DATM 2018-02-14 17:08:40  
OBNUC 13C  
EZMOD carbon [ppm]  
OSPRQ 100.63 MHz  
OBSET 5.35 KHz  
OBPN 5.96 Hz  
POINT 26214  
FREQU 25125.83 Hz  
SCANS 204  
ACQTM 1.0433 sec  
PD 3.0000 sec  
PWI 3.10 usec  
IRNUC 1H  
CTEMP 20.7 c  
SLVNT CDCL3  
EXREF 77.00 ppm  
BF 0.12 Hz  
RGAIN 50

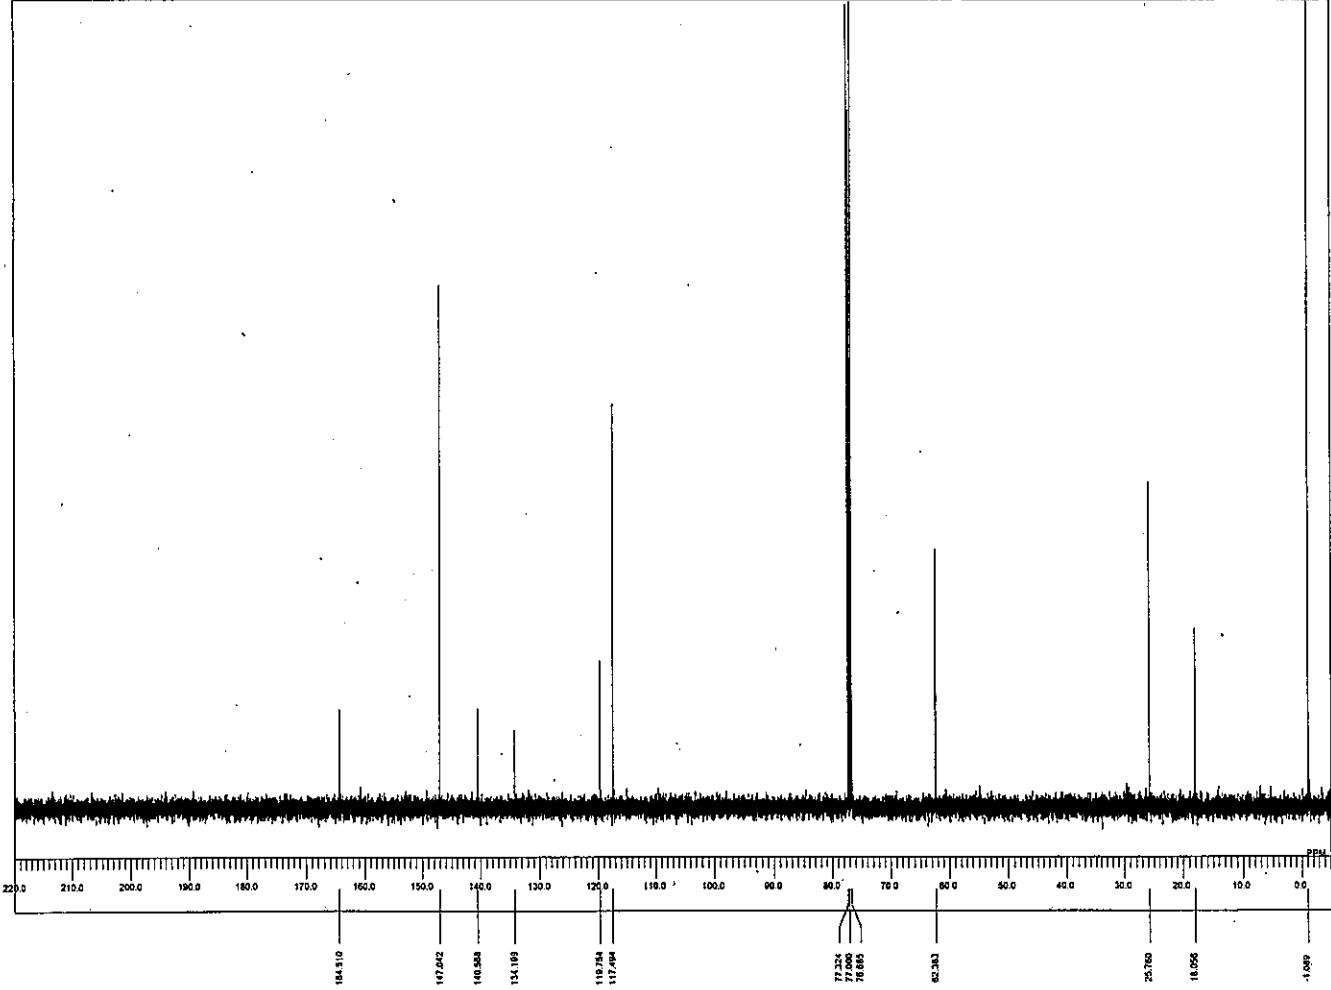

## Calculation details

All calculations were performed with Gaussian 16 program. We used M06 as functionals and SDD (for Ni) and 6-31G\*\* (for others) as basis sets. Single point energy was corrected using SDD (for Ni) and 6-311++G\*\* (for others) basis sets in toluene (SMD). Structure optimizations were carried out at 298.15 K in gas phase. Harmonic vibrational frequencies were computed at the same level of theory to confirm no imaginary vibration was observed for the optimized structure, and only one imaginary vibration was observed for the transition state. The intrinsic reaction coordinate (IRC) method was used to track minimum energy paths from transition structures to the corresponding local minima.

## Geometry of the calculation

```
SM_NiL2_HCN.log
Charge = 0, Spin = 1
Ni -0.223054 0.292569 -1.214397
H 1.283759 1.627018 -3.189715
P 1.396484 0.327975 0.120879
P -2.010133 -0.498727 -0.355099
O 1.312438 -0.415959 1.569528
O 2.829581 -0.266839 -0.462215
O 1.955222 1.782407 0.660193
O -3.398465 -0.079801 -1.088914
O -2.300624 -0.064973 1.221990
O -2.303128 -2.109938 -0.183047
C 0.402477 1.146360 -2.776426
N -0.755811 0.853613 -2.988703
C -1.942729 1.207539 1.614908
C -1.148523 1.336936 2.750262
C -2.380696 2.331466 0.916767
C -0.789219 2.605556 3.189264
H -0.814359 0.438179 3.263732
C -2.012357 3.596154 1.368540
H -3.013877 2.213735 0.039356
C -1.216353 3.738509 2.500725
H -0.171132 2.709302 4.078855
H -2.357514 4.475408 0.828991
H -0.932721 4.728556 2.848455
C -4.686418 -0.091986 -0.586047
C -5.534005 0.888222 -1.093150
C -5.142079 -1.025056 0.339859
C -6.854662 0.939184 -0.665346
H -5.138551 1.589321 -1.824378
C -6.465811 -0.955953 0.762706
H -4.474024 -1.792167 0.717468
C -7.325170 0.018784 0.266772
H -7.517947 1.703303 -1.063958
H -6.827017 -1.681225 1.488282
H -8.358081 0.059489 0.603329
C -1.277412 -2.983273 0.119762
C -0.594971 -2.893612 1.328001
C -0.987400 -3.986603 -0.799383
C 0.401135 -3.824018 1.611521
H -0.847174 -2.100616 2.027392
C 0.000560 -4.917490 -0.498191
H -1.543912 -4.019747 -1.732676
C 0.701272 -4.836053 0.703769
H 0.941726 -3.754028 2.553261
H 0.226395 -5.710015 -1.208671
H 1.475245 -5.564022 0.934129
C 2.386643 -0.546724 2.435538
C 2.588160 0.411846 3.420782
C 3.201195 -1.668982 2.337803
C 3.624240 0.234237 4.331290
H 1.935674 1.281524 3.447545
C 4.234342 -1.833612 3.253801
H 3.013249 -2.393382 1.547544
C 4.446862 -0.885999 4.251297
H 3.790683 0.978481 5.106600
H 4.878417 -2.707151 3.185086
H 5.255547 -1.019507 4.965657
C 2.194675 2.737254 -0.312629
C 1.169389 3.599656 -0.683374
C 3.451191 2.811835 -0.904221
C 1.407456 4.549380 -1.671338
H 0.200178 3.499733 -0.198149
C 3.677154 3.765989 -1.892105
H 4.226743 2.121855 -4.9581289
C 2.657338 4.631626 -2.280373
H 0.608758 5.223612 -1.971139
H 4.657188 3.833867 -2.359129
H 2.838262 5.373905 -3.053947
C 2.794461 -1.034193 -1.609199
C 2.067793 -2.219331 -1.649902
C 3.505844 -0.588916 -2.717649
C 2.038270 -2.953459 -2.831687
H 1.527325 -2.560941 -0.766956
C 3.477869 -1.338188 -3.888286
H 4.055073 0.347939 -2.648035
C 2.739628 -2.517803 -3.951101
H 1.459286 -3.873947 -2.867241
H 4.029740 -0.993531 -4.759746
H 2.712880 -3.095750 -4.871358
C -1.784700 0.808327 1.996146
C -0.970754 0.496613 3.079599
C -1.872155 2.114826 1.518629
C -0.222941 1.503391 3.679313
H -0.916748 -0.534513 3.421029
C -1.106528 3.110675 2.119811
H -2.533309 2.347788 0.685324
C -0.277627 2.808645 3.195367
H 0.414457 1.262593 4.527684
H -1.164517 4.127980 1.738613
H 0.320359 3.588582 3.659676
C -4.833718 0.391731 -0.259535
C -5.488497 1.615045 -0.346657
C -5.429353 -0.703393 0.356503
C -6.761377 1.746158 0.195429
H -4.986030 2.440894 -0.845580
C -6.700988 -0.554213 0.900367
H -4.901020 -1.651303 0.404783
C -7.370533 0.663145 0.822498
H -7.277490 2.701004 0.127933
H -7.172813 -1.404428 1.387648
H -8.365228 0.767019 1.248782
C -1.632489 -2.879353 -0.435638
C -0.741414 -2.980122 0.627542
C -1.554176 -3.746516 -1.521332
C 0.247526 -3.959053 0.592757
H -0.818791 -2.293526 1.466711
C -0.567632 -4.726247 -1.540459
H -2.270105 -3.636565 -2.332112
C 0.339590 -4.832465 -0.487222
H 0.950099 -4.032216 1.420694
H -0.505329 -5.408655 -2.385338
H 1.111193 -5.598238 -0.506571
C 2.701464 -1.327709 2.038234
C 3.128199 -0.707371 3.205534
C 3.380556 -2.418894 1.507761
C 4.254757 -1.197468 3.856683
H 2.571880 0.150936 3.574649
C 4.506497 -2.898770 2.168232
H 3.016716 -2.871779 0.587701
C 4.944590 -2.291988 3.341817
H 4.596620 -0.719021 4.771518
H 5.044712 -3.751515 1.760993
H 5.824662 -2.671378 3.855272
C 2.815750 2.389021 0.116023
C 1.896785 3.341659 -0.310331
C 4.148927 2.445188 -0.276246
C 2.321030 4.357205 -1.161966
TS1.log
Charge = 0, Spin = 1
Imaginary frequency: -136.894
Ni -0.355263 0.504684 -0.742935
H -0.001048 1.004720 -2.750001
P 1.502454 0.179649 0.198175
P -2.225100 -0.338582 -0.255748
O 1.536231 -0.891788 1.427855
O 2.673702 -0.444020 -0.808326
O 2.409804 1.349307 0.934329
O -3.586989 0.326369 -0.855695
O -2.481970 -0.217141 1.384243
O -2.633202 -1.929506 -0.443425
C -0.564182 1.809241 -2.261709
N -1.082051 2.829878 -2.002594
```

H 0.861615 3.269001 0.017838  
C 4.565568 3.477567 -1.110198  
H 4.830390 1.673274 0.072409  
C 3.652377 4.428537 -1.561771  
H 1.599973 5.092033 -1.512576  
H 5.607569 3.532976 -1.417065  
H 3.980299 5.226880 -2.223151  
C 2.272945 -0.638027 -2.115015  
C 1.474704 -1.732507 -2.438047  
C 2.654177 0.287208 -3.082267  
C 1.048253 -1.895765 -3.753150  
H 1.191315 -2.440346 -1.658219  
C 2.226709 0.108546 -4.395117  
H 3.262873 1.140233 -2.784190  
C 1.420119 -0.977650 -4.732090  
H 0.417505 -2.745677 -4.004848  
H 2.518308 0.827850 -5.156778  
H 1.083919 -1.107978 -5.757708

CP\_cis.log

Charge = 0, Spin = 1

Ni 0.206512 0.225819 1.332832  
H -0.901496 0.763740 2.124237  
P -1.340016 0.281740 -0.104930  
P 2.010331 -0.466432 0.347887  
O -1.103063 -0.365861 -1.573477  
O -2.744133 -0.410487 0.363649  
O -1.875968 1.748223 -0.573964  
O 3.367359 0.005889 1.071899  
O 2.212448 0.054176 -1.204105  
O 2.348003 -2.044702 0.123248  
C 0.977147 0.508107 2.990462  
N 1.479251 0.705875 4.028737  
C 1.773407 1.321131 -1.533054  
C 1.195772 1.484556 -2.787587  
C 1.909366 2.399721 -0.660312  
C 0.742858 2.740678 -3.169399  
H 1.097441 0.616968 -3.436430  
C 1.434212 3.649732 -1.052489  
H 2.391969 2.273926 0.308332  
C 0.849783 3.825213 -2.300789  
H 0.297545 2.871877 -4.153657  
H 1.537309 4.492875 -0.372950  
H 0.486886 4.804461 -2.601365  
C 4.631245 0.148993 0.518737  
C 5.369279 1.231026 0.983273  
C 5.156520 -0.744839 -0.406686  
C 6.659203 1.425842 0.505559  
H 4.920716 1.890712 1.722044  
C 6.447467 -0.531071 -0.879545  
H 4.568555 -1.593349 -0.743020  
C 7.200866 0.548030 -0.429177  
H 7.243116 2.268129 0.868647  
H 6.867490 -1.223594 -1.605192  
H 8.210076 0.702332 -0.802574  
C 1.352668 -2.961487 -0.176803  
C 0.710451 -2.929064 -1.408635  
C 1.073169 -3.944517 0.765356  
C -0.233214 -3.910970 -1.698455  
H 0.955079 -2.145607 -2.121872  
C 0.134682 -4.923767 0.458676  
H 1.597601 -3.926616 1.717400

C -0.522185 -4.907945 -0.770282  
H -0.738080 -3.895957 -2.661992  
H -0.083628 -5.704117 1.184399  
H -1.253582 -5.676720 -1.006612  
C -2.112985 -0.513059 -2.517793  
C -2.303098 0.478484 -3.471416  
C -2.868890 -1.679055 -2.517924  
C -3.269081 0.287257 -4.453850  
H -1.695566 1.379074 -3.422655  
C -3.831200 -1.856422 -3.505784  
H -2.693802 -2.426189 -1.746429  
C -4.031631 -0.877108 -4.474687  
H -3.427206 1.055939 -5.206593  
H -4.429818 -2.764146 -3.515066  
H -4.784863 -1.020562 -5.245382  
C -2.413473 2.605962 0.378519  
C -1.571409 3.427417 1.118105  
C -3.792221 2.633628 0.547438  
C -2.129542 4.293388 2.052526  
H -0.496086 3.370828 0.957128  
C -4.337307 3.509097 1.481268  
H -4.411013 1.971223 -0.052588  
C -3.508823 4.335934 2.235403  
H -1.479569 4.932920 2.644224  
H -5.415356 3.543049 1.620040  
H -3.938723 5.014445 2.967957  
C -2.746889 -1.161771 1.532436  
C -2.086819 -2.382399 1.570706  
C -3.407963 -0.651381 2.641110  
C -2.080269 -3.102323 2.761619  
H -1.580439 -2.758080 0.681368  
C -3.401876 -1.386885 3.820564  
H -3.889526 0.321795 2.567277  
C -2.735931 -2.608568 3.884554  
H -1.554373 -4.053628 2.804794  
H -3.906015 -0.994549 4.700076  
H -2.723382 -3.172172 4.813776

CP\_trans.log

Charge = 0, Spin = 1

Ni -0.312665 0.711102 -0.671181  
H -0.195801 -0.399789 0.312375  
C -0.460870 2.068281 -1.962490  
N -0.538159 2.886844 -2.795385  
P 1.791648 0.708803 -0.491637  
O 2.529372 -0.376585 -1.466320  
O 2.465791 0.366986 0.956402  
O 2.584040 2.074309 -0.809722  
C 1.782248 -1.382189 -2.068532  
C 2.773182 -0.924305 1.345287  
C 3.965691 2.166548 -0.657031  
C 2.042953 -2.697234 -1.703386  
C 0.834184 -1.065734 -3.036659  
C 4.059486 -1.393698 1.098172  
C 1.826517 -1.702953 1.999818  
C 4.479466 2.654001 0.537411  
C 4.791167 1.802731 -1.712439  
C 1.340917 -3.719880 -2.333539  
H 2.788595 -2.897287 -0.935623  
C 0.123059 -2.100082 -3.639926  
H 0.662519 -0.027037 -3.313725  
C 4.403321 -2.673956 1.515949

H 4.763295 -0.743720 0.580785  
C 2.185433 -2.984522 2.409366  
H 0.827833 -1.306382 2.178612  
C 5.857426 2.773943 0.676362  
H 3.794286 2.923440 1.336704  
C 6.168514 1.926627 -1.558916  
H 4.347268 1.433164 -2.632353  
C 0.377033 -3.425341 -3.295694  
H 1.547698 -4.754376 -2.067244  
H -0.622566 -1.862257 -4.394382  
C 3.466165 -3.472353 2.169608  
H 5.407276 -3.048699 1.331164  
H 1.449009 -3.601532 2.919229  
C 6.703291 2.408327 -0.367726  
H 6.271707 3.153772 1.607199  
H 6.825568 1.646707 -2.378765  
H -0.171850 -4.228768 -3.780655  
H 3.737991 -4.472847 2.497371  
H 7.780337 2.503711 -0.254042  
P -2.352196 0.330545 -0.288228  
O -2.714601 0.828167 1.233218  
O -2.946978 -1.186719 -0.259472  
O -3.479834 1.021335 -1.202023  
C -1.744240 1.586783 1.877665  
C -2.330302 -2.156708 0.516283  
C -4.836135 1.017197 -0.884199  
C -1.183703 1.080796 3.043639  
C -1.345746 2.810546 1.349710  
C -2.726973 -2.323505 1.837527  
C -1.352742 -2.959239 -0.058916  
C -5.648236 0.005206 -1.376409  
C -5.349193 2.067172 -0.134990  
C -0.199686 1.818180 3.692327  
H -1.516698 0.112761 3.412469  
C -0.345617 3.529610 1.999581  
H -1.801078 3.185811 0.434572  
C -2.134876 -3.330850 2.594389  
H -3.496790 -1.673536 2.245632  
C -0.767063 -3.958201 0.709389  
H -1.057492 -2.790159 -1.093597  
C -7.011549 0.050176 -1.105508  
H -5.204505 -0.794970 -1.961930  
C -6.713845 2.099128 0.128819  
H -4.678222 2.844031 0.223010  
C 0.224231 3.038352 3.169853  
H 0.247181 1.430398 4.604639  
H -0.017546 4.478576 1.583299  
C -1.160287 -4.150609 2.031885  
H -2.445487 -3.480020 3.625860  
H 0.009145 -4.581277 0.268934  
C -7.545709 1.093140 -0.354247  
H -7.659574 -0.734988 -1.487478  
H -7.127978 2.917742 0.712320  
H 1.000230 3.606189 3.677045  
H -0.709032 -4.943972 2.624249  
H -8.612732 1.124086 -0.148217

SM\_Alkyne.log

Charge = 0, Spin = 1

Imaginary frequency: -36.7185

C 1.997642 -0.064291 0.001671

C 0.800614 0.101211 0.000798  
C 3.432563 -0.265184 0.000277  
H 3.926520 0.425152 0.692476  
H 3.693621 -1.287679 0.292807  
H 3.846183 -0.085026 -0.998068  
C -0.617682 0.365787 0.000128  
O -1.116164 1.466056 -0.000273  
O -1.318550 -0.780607 0.000043  
C -2.732861 -0.606876 -0.000273  
H -3.158463 -1.610701 -0.000824  
H -3.056127 -0.055044 0.887664  
H -3.055674 -0.054176 -0.887813

SM\_TS2a.log

Charge = 0, Spin = 1

C 1.933607 -1.915922 0.127229  
C 1.295639 -2.636413 -0.645252  
Ni 0.400468 -0.596549 -0.560397  
H 0.627494 -0.231702 0.837482  
P -1.625813 -0.808858 0.252425  
P 1.136374 1.365579 -0.868145  
O -2.500665 0.514651 -0.104974  
O -2.716640 -2.030545 0.012198  
O -1.767988 -0.801061 1.888538  
O -0.006428 2.291401 -1.536172  
O 2.374934 1.591546 -1.901877  
O 1.725666 2.290033 0.352890  
C 0.140541 -0.735872 -2.438122  
N 0.057347 -0.825154 -3.602987  
C 0.719705 -3.645333 -1.516067  
H -0.309353 -3.885514 -1.213435  
H 0.668259 -3.266981 -2.544297  
H 1.321755 -4.560286 -1.487211  
C 2.936355 -1.548312 1.114651  
O 3.732413 -2.602182 1.358022  
O 3.058771 -0.473592 1.654817  
C 4.758194 -2.354684 2.312284  
H 5.423486 -1.556437 1.965810  
H 4.327653 -2.056575 3.274340  
H 5.308404 -3.290908 2.413176  
C -0.831118 -1.523268 2.606388  
C -0.708100 -2.900088 2.441562  
C -0.008484 -0.825738 3.481898  
C 0.269082 -3.580699 3.161396  
H -1.373261 -3.420900 1.755679  
C 0.961560 -1.518057 4.196822  
H -0.128808 0.251516 3.573637  
C 1.105911 -2.894315 4.037314  
H 0.375255 -4.655673 3.035596  
H 1.618248 -0.969477 4.869311  
H 1.868011 -3.432949 4.596005  
C -3.803217 0.717476 0.337326  
C -4.015203 1.351683 1.554544  
C -4.859980 0.337755 -0.479218  
C -5.319889 1.613920 1.957528  
H -3.155840 1.615652 2.166630  
C -6.159806 0.605085 -0.063798  
H -4.652087 -0.158843 -1.424328  
C -6.392307 1.243288 1.151220  
H -5.498610 2.109334 2.908971  
H -6.994945 0.311870 -0.695307  
H -7.410582 1.451070 1.470504

C -2.788628 -2.774593 -1.145758  
C -3.011850 -4.142113 -0.997328  
C -2.663218 -2.200877 -2.404929  
C -3.083887 -4.945343 -2.129183  
H -3.130025 -4.550438 0.003958  
C -2.712059 -3.020839 -3.528316  
H -2.481349 -1.134342 -2.514186  
C -2.923249 -4.388878 -3.396846  
H -3.259032 -6.013034 -2.018463  
H -2.566136 -2.574312 -4.508538  
H -2.963850 -5.022168 -4.279472  
C -0.047284 3.670071 -1.650889  
C 1.078180 4.442815 -1.909985  
C -1.307915 4.243375 -1.521727  
C 0.924590 5.820289 -2.032531  
H 2.049866 3.971451 -2.022081  
C -1.443848 5.619583 -1.653396  
H -2.158061 3.592136 -1.326749  
C -0.327923 6.412505 -1.906508  
H 1.798859 6.434504 -2.235208  
H -2.427652 6.072703 -1.557112  
H -0.434843 7.489549 -2.008230  
C 3.401008 0.649196 -1.915863  
C 4.394774 0.708472 -0.947522  
C 3.409108 -0.311269 -2.919559  
C 5.420144 -0.231797 -0.981806  
H 4.343072 1.474697 -0.177782  
C 4.439716 -1.245030 -2.938556  
H 2.596147 -0.329367 -3.641485  
C 5.441851 -1.210784 -1.971509  
H 6.208032 -0.192946 -0.232148  
H 4.455760 -2.006476 -3.714696  
H 6.244340 -1.944315 -1.993287  
C 1.117326 2.405182 1.583450  
C 1.940636 2.314273 2.701951  
C -0.243354 2.672866 1.712524  
C 1.400994 2.525299 3.963899  
H 2.988808 2.069244 2.556833  
C -0.769329 2.880559 2.985650  
H -0.878965 2.737106 0.830737  
C 0.045364 2.814959 4.111304  
H 2.044188 2.462786 4.838804  
H -1.826015 3.118107 3.091772  
H -0.373472 2.987988 5.099433

SM\_TS2b.log

Charge = 0, Spin = 1

C -0.352124 -1.964407 -2.063693  
C -0.338011 -2.562815 -1.008192  
Ni -0.372313 0.113435 0.116988  
H -0.196506 0.831348 -1.174892  
P 1.742568 0.113543 -0.111509  
P -2.311463 0.907679 -0.170777  
O 2.282903 1.559435 0.406716  
O 2.810699 -0.947355 0.499943  
O 2.265279 0.020462 -1.649623  
O -3.376273 0.710712 1.032833  
O -3.172392 0.552522 -1.503275  
O -2.262907 2.523809 -0.415608  
C -0.643026 -0.629915 1.824755  
N -0.838996 -1.051471 2.899588  
C -0.364796 -1.255247 -3.326849

H -1.248453 -0.608370 -3.388941  
H 0.528823 -0.628608 -3.425871  
H -0.397344 -1.959070 -4.165688  
C -0.501954 -3.304136 0.227054  
O -1.563985 -3.761990 0.585226  
O 0.648090 -3.412499 0.891156  
C 0.534814 -3.997948 2.196152  
H 1.555033 -4.050033 2.580412  
H -0.080418 -3.347222 2.826959  
H 0.086983 -4.993519 2.128369  
C -3.984995 -0.576070 -1.579573  
C -3.649990 -1.771018 -0.956532  
C -5.153082 -0.443894 -2.319125  
C -4.510187 -2.856958 -1.080208  
H -2.744949 -1.871696 -0.361552  
C -6.001290 -1.538459 -2.436269  
H -5.385024 0.516624 -2.772132  
C -5.684348 -2.745790 -1.817609  
H -4.237357 -3.787605 -0.588520  
H -6.920507 -1.442688 -3.009441  
H -6.353820 -3.597400 -1.910417  
C -4.747678 0.927271 0.941265  
C -5.563910 -0.092937 1.413609  
C -5.275853 2.102163 0.420287  
C -6.942422 0.061411 1.346413  
H -5.100344 -0.992636 1.809949  
C -6.659714 2.237808 0.354626  
H -4.613938 2.886868 0.065319  
C -7.493935 1.223012 0.811370  
H -7.588276 -0.734777 1.708456  
H -7.085465 3.150446 -0.056089  
H -8.573556 1.338426 0.755094  
C -1.202105 3.225699 0.141285  
C -0.496033 4.085035 -0.690728  
C -0.875620 3.084937 1.486671  
C 0.561763 4.816453 -0.161826  
H -0.789099 4.165704 -1.734330  
C 0.200898 3.806300 1.994535  
H -1.451226 2.418223 2.126384  
C 0.919420 4.671351 1.176421  
H 1.115558 5.499486 -0.802792  
H 0.471656 3.689681 0.304095  
H 1.758511 5.233140 1.579284  
C 3.530022 2.062338 0.068944  
C 3.589520 3.041470 -0.916083  
C 4.671119 1.619498 0.725386  
C 4.823899 3.585226 -1.254044  
H 2.662615 3.354485 -1.392786  
C 5.900693 2.167736 0.372578  
H 4.587040 0.860926 1.500355  
C 5.981132 3.145636 -0.614484  
H 4.882118 4.353461 -2.021638  
H 6.801589 1.826695 0.876743  
H 6.945504 3.570524 -0.881813  
C 3.340580 -0.720961 -2.130312  
C 3.246109 -2.106254 -2.205363  
C 4.455569 -0.041925 -2.599976  
C 4.301110 -2.820839 -2.760748  
H 2.356978 -2.603577 -1.820729  
C 5.500842 -0.770910 -3.158899  
H 4.492274 1.042222 -2.519589  
C 5.428310 -2.157688 -3.239586

H 4.238305 -3.904847 -2.821421  
H 6.378236 -0.246628 -3.530161  
H 6.248893 -2.722471 -3.675164  
C 2.969556 -1.376840 1.799710  
C 2.425219 -0.718385 2.894611  
C 3.766018 -2.507795 1.953019  
C 2.661083 -1.234635 4.165933  
H 1.796018 0.158608 2.764723  
C 4.011457 -2.995094 3.230131  
H 4.170080 -2.981435 1.061100  
C 3.453396 -2.363578 4.340684  
H 2.209441 -0.743575 5.023988  
H 4.636010 -3.876418 3.357079  
H 3.635731 -2.752365 5.339305

TS2a.log

Charge = 0, Spin = 1

Imaginary frequency: -406.7058  
C 2.131808 1.562637 -0.068878  
C 1.588602 2.264667 0.814942  
Ni 0.563974 0.491280 0.655439  
H 1.014185 0.306062 -0.731852  
P -1.484795 0.991455 -0.238262  
P 0.834028 -1.612940 0.840404  
O -2.544354 -0.220175 0.006171  
O -2.416505 2.328953 0.067450  
O -1.575536 1.103058 -1.878959  
O -0.441223 -2.394072 1.444193  
O 2.010948 -2.067812 1.873107  
O 1.309404 -2.543948 -0.424764  
C 0.235801 0.538494 2.522194  
N 0.114625 0.555110 3.686752  
C 1.302810 3.348514 1.744728  
H 0.305204 3.767349 1.548671  
H 1.280547 2.959570 2.769909  
H 2.050676 4.144593 1.660523  
C 3.187162 1.272308 -1.030841  
O 4.056776 2.294215 -1.069775  
O 3.289302 0.270502 -1.701762  
C 5.127065 2.121309 -1.990249  
H 5.723971 1.241044 -1.729448  
H 4.743421 1.993698 -3.008487  
H 5.733135 3.025454 -1.921934  
C -0.557087 1.807319 -2.500093  
C -0.430463 3.182765 -2.324202  
C 0.338741 1.096322 -3.287980  
C 0.627170 3.845649 -2.939637  
H -1.157596 3.712605 -1.713618  
C 1.393079 1.769754 -3.893894  
H 0.207667 0.022947 -3.399958  
C 1.543051 3.143319 -3.719162  
H 0.735375 4.919618 -2.806791  
H 2.108461 1.205290 -4.489250  
H 2.369925 3.668237 -4.192262  
C -3.866529 -0.192744 -0.420031  
C -4.181820 -0.630337 -1.699932  
C -4.849754 0.213186 0.472659  
C -5.516835 -0.665267 -2.088094  
H -3.376762 -0.922387 -2.369912  
C -6.180367 0.173855 0.071580  
H -4.560696 0.552633 1.464843  
C -6.516516 -0.266034 -1.205674

H -5.776039 -1.005536 -3.087938  
H -6.958070 0.489468 0.762848  
H -7.558612 -0.296452 -1.514095  
C -2.358772 3.028540 1.253566  
C -2.361550 4.419063 1.165282  
C -2.324578 2.389989 2.487030  
C -2.309789 5.174809 2.330653  
H -2.414128 4.885262 0.183997  
C -2.246765 3.158120 3.645002  
H -2.314476 1.303953 2.548608  
C -2.242743 4.546761 3.572909  
H -2.315280 6.260489 2.266008  
H -2.174321 2.652429 4.604456  
H -2.187303 5.140306 4.481960  
C -0.684560 -3.758060 1.444109  
C 0.301214 -4.696835 1.723347  
C -1.995764 -4.137576 1.179943  
C -0.045238 -6.044236 1.724110  
H 1.314525 -4.373685 1.942666  
C -2.325675 -5.487360 1.191132  
H -2.733612 -3.363224 0.978707  
C -1.351232 -6.444413 1.459696  
H 0.718569 -6.787565 1.940059  
H -3.350067 -5.790405 0.988286  
H -1.609997 -7.500247 1.466278  
C 3.184000 -1.314143 1.866974  
C 4.106646 -1.494935 0.844923  
C 3.398623 -0.405732 2.896799  
C 5.271920 -0.734222 0.849580  
H 3.896375 -2.214462 0.057720  
C 4.567637 0.347593 2.886415  
H 2.635101 -0.283091 3.661229  
C 5.502088 0.189699 1.864320  
H 5.999978 -0.868528 0.052180  
H 4.746056 1.066825 3.682326  
H 6.412534 0.784646 1.863141  
C 0.773911 -2.437759 -1.690766  
C 1.671867 -2.327503 -2.748014  
C -0.598208 -2.510639 -1.913275  
C 1.189280 -2.323757 -4.050562  
H 2.731168 -2.231644 -2.526963  
C -1.066616 -2.497117 -3.224954  
H -1.286860 -2.594363 -1.073584  
C -0.180269 -2.413487 -4.294243  
H 1.887815 -2.244268 -4.880441  
H -2.136354 -2.573998 -3.408734  
H -0.555197 -2.412827 -5.314574

TS2b.log

Charge = 0, Spin = 1

Imaginary frequency: -404.6588  
C 0.238731 -1.275747 -2.786380  
C -0.056463 -2.161312 -1.956904  
Ni -0.591966 -0.467710 -1.007750  
H -0.058276 0.368910 -2.099291  
P 1.455300 0.070271 0.049178  
P -2.051732 1.051587 -0.779072  
O 1.515065 1.555577 0.744282  
O 2.336867 -0.841304 1.092958  
O 2.647126 0.211443 -1.083127  
O -2.144300 1.504724 0.780173  
O -3.575616 0.766781 -1.236183

O -1.974723 2.472513 -1.588189  
C -1.499191 -1.442846 0.329839  
N -2.073119 -2.008903 1.179085  
C 0.795637 -0.712629 -4.021941  
H 0.038599 -0.141864 -4.571635  
H 1.631639 -0.039840 -3.793302  
H 1.157067 -1.520782 -4.666585  
C -0.319904 -3.448612 -1.322643  
O -1.199510 -4.199561 -1.665465  
O 0.525000 -3.642915 -0.307307  
C 0.147781 -4.683709 0.599513  
H 0.953646 -4.740564 1.333270  
H -0.791090 -4.399469 1.089455  
H 0.024451 -5.633765 0.072127  
C -4.153404 -0.502114 -1.175083  
C -3.731476 -1.500977 -2.041017  
C -5.171627 -0.708265 -0.256856  
C -4.319681 -2.757702 -1.951499  
H -2.934899 -1.299414 -2.754399  
C -5.764441 -1.963956 -0.192311  
H -5.472641 0.105998 0.398555  
C -5.334294 -2.989935 -1.028724  
H -3.965391 -3.558418 -2.595011  
H -6.559482 -2.143378 0.527386  
H -5.788916 -3.974899 -0.958940  
C -3.321567 1.793066 1.456728  
C -3.687569 0.935099 2.485757  
C -4.077972 2.909742 1.125283  
C -4.841474 1.216651 3.209182  
H -3.080392 0.050034 2.670424  
C -5.234043 3.172702 1.853663  
H -3.766842 3.546753 0.300225  
C -5.614891 2.332427 2.896286  
H -5.142457 0.552889 4.016141  
H -5.839425 4.040428 1.602702  
H -6.517806 2.545258 3.463378  
C -0.803332 3.204844 -1.620734  
C -0.016360 3.147727 -2.765511  
C -0.467542 4.029196 -0.552317  
C 1.118303 3.948878 -2.849692  
H -0.323932 2.500348 -3.583785  
C 0.663971 4.829912 -0.650982  
H -1.095060 4.036106 0.335497  
C 1.451952 4.798854 -1.799293  
H 1.733201 3.918663 -3.746003  
H 0.935438 5.479386 0.177796  
H 2.332653 5.433342 -1.870509  
C 2.702860 2.092647 1.217596  
C 3.429116 2.945755 0.395111  
C 3.133946 1.787204 2.502975  
C 4.604019 3.513566 0.877066  
H 3.059053 3.141535 -0.608184  
C 4.314964 2.354003 2.970096  
H 2.543571 1.110506 3.116932  
C 5.050744 3.216947 2.162301  
H 5.175990 4.185995 0.241418  
H 4.661364 2.117931 3.973401  
H 5.971243 3.659362 2.535338  
C 3.772340 -0.597222 -1.139423  
C 3.669123 -1.873792 -1.679623  
C 4.986960 -0.103651 -0.680798  
C 4.809158 -2.664665 -1.772109

H 2.694077 -2.234497 -2.003770  
C 6.120630 -0.902643 -0.784595  
H 5.026048 0.891316 -0.241442  
C 6.037066 -2.180967 -1.329407  
H 4.734533 -3.665745 -2.190560  
H 7.075897 -0.523171 -0.429141  
H 6.926808 -2.801402 -1.404399  
C 1.838857 -1.628158 2.105557  
C 0.660543 -1.332700 2.779345  
C 2.619650 -2.725755 2.457526  
C 0.243520 -2.181155 3.801462  
H 0.053191 -0.475027 2.492305  
C 2.205405 -3.544964 3.499614  
H 3.536920 -2.909577 1.902068  
C 1.011375 -3.279857 4.169581  
H -0.699198 -1.975940 4.302670  
H 2.814712 -4.399790 3.785043  
H 0.681267 -3.930275 4.975652

INT1a.log

Charge = 0, Spin = 1

C 2.414156 2.061988 -0.273940  
C 2.016739 1.222670 -1.246258  
Ni 0.182664 0.721377 -1.018645  
H 1.707028 2.363318 0.500779  
P 0.847125 -0.996279 0.106814  
P -1.967462 0.543749 -0.572344  
O -0.368225 -1.807860 0.816628  
O 1.576549 -2.151552 -0.795304  
O 1.863523 -0.943891 1.363633  
O -2.663478 -0.858596 -0.986121  
O -3.080095 1.561091 -1.181328  
O -2.290418 0.645942 1.029428  
C -0.052927 2.039171 -2.303961  
N -0.213688 2.835911 -3.146534  
C 2.812594 0.727228 -2.406022  
H 3.572794 0.009708 -2.061696  
H 2.179928 0.232499 -3.150210  
H 3.350556 1.549791 -2.889996  
C 3.727787 2.673534 -0.051010  
O 4.686494 2.238437 -0.898393  
O 3.951094 3.479398 0.830645  
C 5.961988 2.827364 -0.700478  
H 5.913438 3.915939 -0.807600  
H 6.345359 2.596786 0.299802  
H 6.616940 2.399979 -1.462043  
C 3.219625 -0.630524 1.368473  
C 4.142209 -1.406547 0.676648  
C 3.617879 0.432470 2.167798  
C 5.492686 -1.081192 0.772998  
H 3.803024 -2.254639 0.090174  
C 4.969404 0.738913 2.260340  
H 2.857550 1.024142 2.674297  
C 5.909722 -0.014505 1.561643  
H 6.223298 -1.679151 0.233201  
H 5.281424 1.589800 2.860768  
H 6.967104 0.229828 1.633794  
C -0.255292 -3.093422 1.332906  
C 0.246389 -3.290017 2.613221  
C -0.726248 -4.148328 0.561329  
C 0.279461 -4.583585 3.124653  
H 0.605055 -2.436497 3.182584

C -0.688625 -5.434881 1.086863  
H -1.118007 -3.942209 -0.433434  
C -0.185465 -5.654132 2.366432  
H 0.671499 -4.753560 4.124492  
H -1.054254 -6.268571 0.492554  
H -0.157039 -6.661603 2.773807  
C 1.321974 -2.294577 -2.150124  
C 2.398999 -2.653424 -2.951692  
C 0.052841 -2.104093 -2.686069  
C 2.208172 -2.788263 -4.320596  
H 3.374187 -2.797136 -2.492388  
C -0.117362 -2.221150 -4.063967  
H -0.798029 -1.875145 -2.046436  
C 0.954137 -2.558466 -4.882525  
H 3.048680 -3.061200 -4.953854  
H -1.102192 -2.051744 -4.491474  
H 0.812598 -2.648113 -5.956247  
C -3.909390 -1.241718 -0.490325  
C -5.064773 -0.847439 -1.150975  
C -3.947401 -2.050979 0.637715  
C -6.292653 -1.284708 -0.663787  
H -4.987628 -0.209382 -2.026680  
C -5.181643 -2.482860 1.109796  
H -3.012498 -2.326572 1.122383  
C -6.353520 -2.100737 0.462049  
H -7.206542 -0.985105 -1.170971  
H -5.226470 -3.119358 1.990192  
H -7.316446 -2.440036 0.835736  
C -3.317780 2.814306 -0.618603  
C -4.203287 2.906783 0.449446  
C -2.692628 3.931710 -1.156265  
C -4.445975 4.154684 1.011608  
H -4.678604 2.003996 0.825828  
C -2.948786 5.173617 -0.580244  
H -2.011425 3.812637 -1.996780  
C -3.815285 5.287379 0.502738  
H -5.130795 4.240865 1.851853  
H -2.461720 6.057067 -0.985726  
H -4.004666 6.260903 0.948543  
C -1.331869 1.091408 1.923253  
C -0.725827 2.334738 1.767386  
C -1.022169 0.264783 2.998021  
C 0.232388 2.737728 2.695739  
H -1.007667 2.984492 0.938011  
C -0.078968 0.687963 3.925953  
H -1.521045 -0.698702 3.077968  
C 0.553939 1.920863 3.774880  
H 0.731897 3.695306 2.565710  
H 0.167905 0.047445 4.769941  
H 1.296200 2.245964 4.500110

INT1b.log

Charge = 0, Spin = 1

C 1.014586 -3.307834 0.891958  
C 0.652745 -2.169422 1.503233  
Ni -0.603169 -0.960524 0.688427  
H 0.613380 -3.470000 -0.115303  
P 1.153307 -0.062028 -0.145655  
P -2.296069 0.032999 -0.291765  
O 0.846549 1.145261 -1.206635  
O 2.282982 0.557631 0.847005  
O 2.107064 -1.025359 -1.016259

O -3.591581 0.258246 0.636505  
O -2.859690 -0.942832 -1.457660  
O -2.242320 1.410221 -1.194535  
C -1.897870 -2.102031 1.393336  
N -2.762323 -2.813422 1.735640  
C 1.868276 -4.416142 1.414474  
H 1.327761 -5.368495 1.342910  
H 2.770695 -4.522824 0.795855  
H 2.179237 -4.249794 2.447278  
C 1.097799 -1.799925 2.859594  
O 2.136588 -2.133748 3.400021  
O 0.210378 -0.972273 3.446806  
C 0.488849 -0.621123 4.795625  
H -0.261589 0.119975 5.075012  
H 0.409862 -1.501336 5.442496  
H 1.494090 -0.200643 4.890845  
C -1.968390 -1.860799 -2.003994  
C -0.920064 -1.412540 -2.799100  
C -2.165210 -3.210239 -1.743643  
C -0.034868 -2.343866 -3.334206  
H -0.816964 -0.344031 -2.985175  
C -1.281448 -4.129777 -2.297833  
H -2.980281 -3.509105 -1.089823  
C -0.215389 -3.701001 -3.087046  
H 0.802867 -2.004309 -3.940428  
H -1.420442 -5.189503 -2.098773  
H 0.476414 -4.426671 -3.507164  
C -4.906417 0.078362 0.203584  
C -5.519530 -1.134875 0.482112  
C -5.563695 1.116558 -0.439139  
C -6.846300 -1.302120 0.101529  
H -4.944128 -1.911311 0.986923  
C -6.891045 0.930052 -0.813719  
H -5.038655 2.048977 -0.634254  
C -7.531916 -0.275249 -0.543903  
H -7.347847 -2.243777 0.311791  
H -7.424633 1.732567 -1.317436  
H -8.569609 -0.415303 -0.837113  
C -1.839681 2.626589 -0.683430  
C -1.031102 3.409042 -1.503376  
C -2.246616 3.086443 0.567462  
C -0.606945 4.653856 -1.060734  
H -0.733784 3.012716 -2.471513  
C -1.821678 4.344582 0.992856  
H -2.896903 2.478194 1.191201  
C -0.998984 5.127034 0.190973  
H 0.036630 5.256219 -1.697776  
H -2.148767 4.712266 1.963451  
H -0.669584 6.104490 0.534076  
C 1.820605 1.703331 -2.019652  
C 1.808062 1.378177 -3.371404  
C 2.744216 2.601318 -1.498848  
C 2.751914 1.952561 -4.216134  
H 1.061120 0.677517 -3.739802  
C 3.689638 3.160398 -2.352823  
H 2.709341 2.856175 -0.442308  
C 3.699479 2.836584 -3.706549  
H 2.747543 1.705391 -5.275031  
H 4.421933 3.858301 -1.954504  
H 4.440405 3.280235 -4.366719  
C 3.482064 -1.216903 -0.897808  
C 4.036966 -1.751249 0.259780

C 4.258990 -0.916582 -2.008160  
C 5.407152 -1.988479 0.289359  
H 3.411595 -1.968544 1.123871  
C 5.626759 -1.165781 -1.962416  
H 3.782844 -0.487200 -2.887529  
C 6.203772 -1.702129 -0.815955  
H 5.851677 -2.404691 1.190295  
H 6.241669 -0.935275 -2.829201  
H 7.273228 -1.894938 -0.782086  
C 2.037798 1.369157 1.938018  
C 1.006865 2.301577 1.954665  
C 2.927241 1.245204 2.999212  
C 0.858244 3.108570 3.079752  
H 0.334579 2.411238 1.104507  
C 2.776748 2.074911 4.103348  
H 3.708390 0.490771 2.941504  
C 1.738925 3.003714 4.150723  
H 0.049739 3.836229 3.098034  
H 3.470377 1.986772 4.936355  
H 1.621207 3.646856 5.019106

INT1a2.log

Charge = 0, Spin = 1

C -2.457442 2.021041 0.235586  
C -2.062561 1.196099 1.221381  
Ni -0.216516 0.730118 1.019695  
H -1.744039 2.324417 -0.532442  
P -0.826501 -1.021478 -0.083950  
P 1.944215 0.609776 0.595571  
O 0.419465 -1.794945 -0.781896  
O -1.515026 -2.186503 0.838741  
O -1.846776 -1.035476 -1.338253  
O 2.675742 -0.757992 1.061621  
O 3.008621 1.683763 1.193772  
O 2.309513 0.682652 -0.998262  
C -0.028280 2.051894 2.308811  
N 0.097797 2.847403 3.158413  
C -2.868501 0.692338 2.370109  
H -3.607417 -0.042983 2.015859  
H -2.238921 0.214997 3.128170  
H -3.431819 1.506318 2.839307  
C -3.775537 2.611105 -0.016604  
O -4.738110 2.188338 0.832202  
O -3.996978 3.393420 -0.919763  
C -6.016264 2.762975 0.610936  
H -5.976180 3.854081 0.692868  
H -6.390755 2.506319 -0.386286  
H -6.673759 2.348900 1.377672  
C -3.202676 -0.724313 -1.351549  
C -4.120115 -1.461551 -0.612481  
C -3.606008 0.293832 -2.204812  
C -5.471238 -1.141361 -0.716951  
H -3.776235 -2.277465 0.015586  
C -4.957882 0.596179 -2.303833  
H -2.847495 0.851705 -2.750639  
C -5.893326 -0.118384 -1.558914  
H -6.198301 -1.708975 -0.140860  
H -5.274981 1.412693 -2.947706  
H -6.951177 0.121972 -1.637212  
C 0.345702 -3.076379 -1.315634  
C -0.061004 -3.254566 -2.631616  
C 0.760751 -4.141405 -0.526119

C -0.057699 -4.540580 -3.161846  
H -0.371521 -2.389530 -3.212114  
C 0.760210 -5.420932 -1.070744  
H 1.083690 -3.949332 0.495941  
C 0.349975 -5.622015 -2.385796  
H -0.375712 -4.696863 -4.189811  
H 1.082340 -6.263098 -0.463398  
H 0.350428 -6.623882 -2.807763  
C -1.259687 -2.294234 2.196826  
C -2.327346 -2.666233 3.005058  
C 0.002990 -2.058351 2.729882  
C -2.134560 -2.767232 4.376695  
H -3.297669 -2.848046 2.549125  
C 0.174607 -2.141641 4.110053  
H 0.848477 -1.820394 2.086670  
C -0.888244 -2.490976 4.934737  
H -2.967969 -3.050546 5.014766  
H 1.153932 -1.936183 4.534366  
H -0.745807 -2.554297 6.010202  
C 3.926036 -1.138155 0.574427  
C 5.081216 -0.636829 1.158619  
C 3.968371 -2.054952 -0.467932  
C 6.312792 -1.072507 0.678545  
H 5.002255 0.078798 1.971805  
C 5.206261 -2.483681 -0.932968  
H 3.034205 -2.420226 -0.891039  
C 6.378190 -1.992771 -0.363346  
H 7.226494 -0.689883 1.126844  
H 5.253610 -3.203977 -1.746129  
H 7.344201 -2.329739 -0.731105  
C 3.184770 2.935718 0.603645  
C 4.068816 3.050004 -0.463623  
C 2.503273 4.031899 1.115712  
C 4.251784 4.296461 -1.050967  
H 4.590430 2.164598 -0.819059  
C 2.699537 5.272650 0.514362  
H 1.828963 3.898100 1.959274  
C 3.563567 5.406792 -0.568062  
H 4.935414 4.399032 -1.890347  
H 2.168263 6.139117 0.900486  
H 3.706402 6.379093 -1.033419  
C 1.371820 1.029159 -1.952147  
C 0.618803 2.194015 -1.840188  
C 1.236435 0.181877 -3.046596  
C -0.317307 2.488461 -2.830916  
H 0.771024 2.869051 -0.996785  
C 0.315767 0.499232 -4.036853  
H 1.847902 -0.716796 -3.090492  
C -0.468733 1.646741 -3.928033  
H -0.933744 3.380304 -2.734031  
H 0.206247 -0.157163 -4.897599  
H -1.193820 1.887684 -4.701784

TS3.log

Charge = 0, Spin = 1

Imaginary frequency: -183.9952  
C -2.527621 2.079926 0.320244  
C -2.181480 1.137204 1.232991  
Ni -0.370772 0.586568 0.837397  
H -1.743566 2.646301 -0.184304  
P -0.581802 -1.340610 -0.163567  
P 1.757944 0.916263 0.545623

O 0.840919 -1.875671 -0.744866  
O -1.054161 -2.592739 0.795359  
O -1.507117 -1.679274 -1.463039  
O 2.732931 -0.250745 1.107337  
O 2.538146 2.203175 1.188676  
O 2.229891 1.048076 -1.023176  
C -0.736924 1.721251 2.231437  
N -0.700467 2.306597 3.251982  
C -3.099475 0.295226 2.057892  
H -3.647065 -0.396006 1.398778  
H -2.540234 -0.289930 2.793470  
H -3.842384 0.906887 2.579011  
C -3.860726 2.429221 -0.168522  
O -4.866211 1.984838 0.616271  
O -4.056660 3.069491 -1.184369  
C -6.169612 2.348777 0.189051  
H -6.248175 3.431093 0.046927  
H -6.424716 1.856213 -0.756869  
H -6.850332 2.017150 0.974984  
C -2.873032 -1.422997 -1.422997  
C -3.731728 -2.381429 -0.898668  
C -3.348575 -0.238621 -1.972837  
C -5.102203 -2.140710 -0.922470  
H -3.315147 -3.299579 -0.492936  
C -4.721025 -0.015529 -1.997412  
H -2.642587 0.490629 -2.369433  
C -5.597426 -0.961241 -1.471287  
H -5.784701 -2.883033 -0.515409  
H -5.093434 0.917361 -2.415789  
H -6.669865 -0.779458 -1.491765  
C 1.082260 -3.179620 -1.155845  
C 0.744409 -3.577927 -2.443231  
C 1.733585 -4.033831 -0.274513  
C 1.067635 -4.868573 -2.849386  
H 0.231425 -2.878047 -3.079459  
C 2.052051 -5.320207 -0.695189  
H 1.985023 -3.674004 0.721710  
C 1.719661 -5.739019 -1.980651  
H 0.807776 -5.194473 -3.853746  
H 2.562322 -5.996902 -0.014218  
H 1.970419 -6.745456 -2.306372  
C -0.973879 -2.501796 2.172575  
C -2.043997 -3.010799 2.899824  
C 0.125961 -1.933337 2.807955  
C -2.023287 -2.924043 4.286014  
H -2.884599 -3.444730 2.363196  
C 0.119675 -1.828679 4.197242  
H 0.980605 -1.578627 2.232712  
C -0.949396 -2.320256 4.937451  
H -2.859398 -3.316092 4.860053  
H 0.963197 -1.359419 4.696823  
H -0.945778 -2.236435 6.020943  
C 4.059034 -0.380224 0.700499  
C 5.053494 0.361956 1.322936  
C 4.347823 -1.296645 -0.302500  
C 6.373786 0.173161 0.925402  
H 4.783434 1.068628 2.102212  
C 5.671753 -1.476581 -0.686050  
H 3.532248 -1.853716 -0.760122  
C 6.685146 -0.742574 -0.075204  
H 7.163526 0.746138 1.405427  
H 5.911001 -2.193172 -1.468143



H 7.719275 -0.885702 -0.378806  
C 2.326441 3.464266 0.642164  
C 3.171301 3.894744 -0.375451  
C 1.299996 4.264746 1.129367  
C 2.968169 5.152163 -0.931633  
H 3.964049 3.233507 -0.717263  
C 1.107432 5.520422 0.557456  
H 0.673095 3.898242 1.939895  
C 1.932771 5.962847 -0.472208  
H 3.620014 5.498176 -1.730236  
H 0.305423 6.155363 0.926101  
H 1.773324 6.943530 -0.913828  
C 1.283864 1.127649 -2.029171  
C 0.349325 2.158612 -2.049141  
C 1.315703 0.163003 -3.030089  
C -0.595572 2.196680 -3.072286  
H 0.377051 2.931602 -1.281197  
C 0.383232 0.226171 -4.058406  
H 2.060412 -0.628034 -2.973892  
C -0.579826 1.233705 -4.076745  
H -1.348694 2.982119 -3.073323  
H 0.402147 -0.524030 -4.846002  
H -1.316566 1.269242 -4.875548

PD.log

Charge = 0, Spin = 1

C -2.889545 -0.595680 -0.270395  
C -2.505576 -1.301760 0.913415  
Ni -1.006343 -0.246412 0.120209  
H -3.443813 0.336606 -0.152422  
P 0.842420 -0.796709 1.052173  
P -0.532501 1.388450 -1.201531  
O 2.101004 0.227222 0.852066  
O 0.881551 -1.085544 2.675094  
O 1.613784 -2.154544 0.577564  
O 0.747141 2.253305 -0.669465  
O -1.646876 2.563276 -1.454075  
O -0.203250 1.163457 -2.786433  
C -2.905783 -0.628671 2.124209  
N -3.262325 -0.103589 3.102135  
C -2.352732 -2.795934 1.100302

H -1.873199 -3.269755 0.243734  
H -1.755096 -2.995356 1.998250  
H -3.336642 -3.263493 1.241649  
C -3.006199 -1.127567 -1.641067  
O -2.921759 -2.470999 -1.716141  
O -3.171708 -0.427235 -2.620686  
C -3.023965 -3.013517 -3.024428  
H -3.903455 -2.622219 -3.544311  
H -2.130912 -2.768755 -3.613483  
H -3.104340 -4.095191 -2.898339  
C 0.938272 -3.288191 0.165119  
C 0.882921 -4.379567 1.022772  
C 0.401780 -3.341222 -1.115073  
C 0.277655 -5.551657 0.581830  
H 1.318081 -4.290561 2.015346  
C -0.192337 -4.522554 -1.546443  
H 0.459488 -2.466035 -1.759023  
C -0.257316 -5.627467 -0.702490  
H 0.227995 -6.412511 1.244272  
H -0.599637 -4.571769 -2.554961  
H -0.720770 -6.549477 -1.044735  
C 3.381817 -0.015818 1.328515  
C 4.328607 -0.539959 0.456199  
C 3.717754 0.342811 2.628168  
C 5.635976 -0.709661 0.896634  
H 4.020303 -0.812596 -0.550593  
C 5.028929 0.164879 3.057553  
H 2.957688 0.760248 3.284559  
C 5.988561 -0.359307 2.196995  
H 6.382135 -1.118796 0.219607  
H 5.300401 0.442490 4.073227  
H 7.011956 -0.492894 2.538674  
C 0.243395 -0.208533 3.533920  
C -0.345706 -0.756531 4.667316  
C 0.213361 1.166652 3.302670  
C -0.986157 0.078187 5.571769  
H -0.303361 -1.833304 4.810425  
C -0.442389 1.989273 4.216312  
H 0.703542 1.594233 2.428791  
C -1.042973 1.451662 5.347698  
H -1.458786 -0.349815 6.452131

H -0.472033 3.062495 4.036947  
H -1.554554 2.098983 6.055071  
C 1.540201 3.143649 -1.368703  
C 1.034607 4.031506 -2.312494  
C 2.894759 3.118954 -1.050388  
C 1.915403 4.902951 -2.945466  
H -0.026799 4.038234 -2.542911  
C 3.758840 4.000761 -1.688046  
H 3.240749 2.406566 -0.303350  
C 3.272537 4.894007 -2.638535  
H 1.530049 5.599413 -3.686530  
H 4.817655 3.986631 -1.440354  
H 3.949294 5.582289 -3.138669  
C -2.638192 2.754531 -0.507686  
C -3.944889 2.859761 -0.968403  
C -2.341693 2.814027 0.850870  
C -4.972754 3.010358 -0.044434  
H -4.130906 2.784167 -2.036328  
C -3.383995 2.935217 1.765467  
H -1.309654 2.743307 1.193579  
C -4.697967 3.035350 1.321625  
H -5.999530 3.084930 -0.394843  
H -3.161553 2.920389 2.830044  
H -5.508642 3.123101 2.039967  
C 0.486587 0.033335 -3.176253  
C -0.148562 -0.830108 -4.062854  
C 1.787651 -0.203079 -2.739603  
C 0.542746 -1.941154 -4.535368  
H -1.173582 -0.608453 -4.352686  
C 2.462775 -1.323698 -3.217531  
H 2.264379 0.493649 -2.050067  
C 1.848205 -2.190486 -4.116315  
H 0.056847 -2.616499 -5.237351  
H 3.481465 -1.516503 -2.887425  
H 2.383594 -3.061210 -4.486036

#### 4. X-ray Crystallographic Analysis

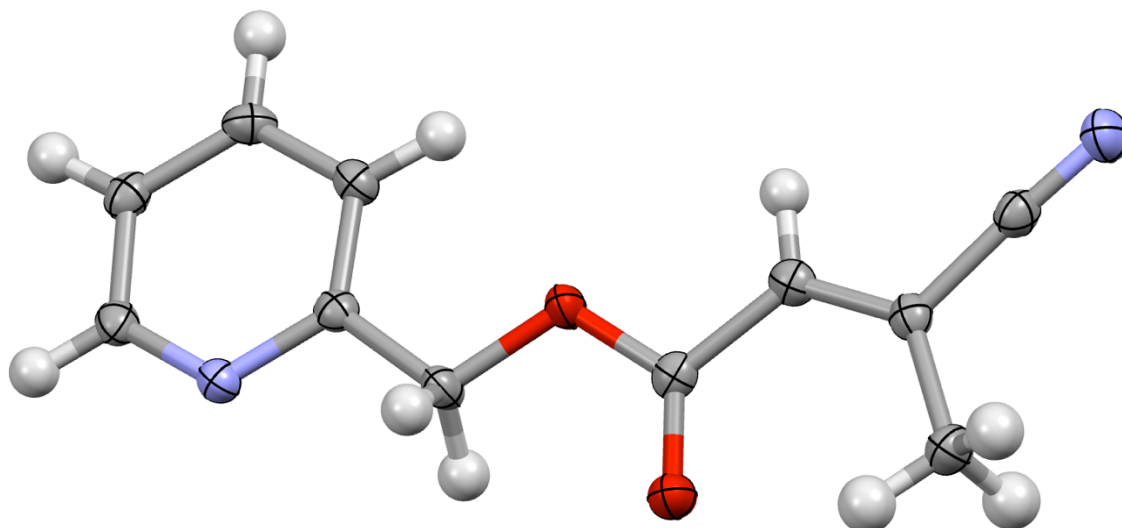

**Figure S<sub>xray</sub>-1.** X-ray crystallographic analysis of (E)-**2k**. Ellipsoids are drawn at the 50% probability level.  
CCDC 940594

|                      |                                                                                                                 |
|----------------------|-----------------------------------------------------------------------------------------------------------------|
| Empirical Formula    | C <sub>11</sub> H <sub>10</sub> N <sub>2</sub> O <sub>2</sub>                                                   |
| Formula Weight       | 202.21                                                                                                          |
| Crystal Color, Habit | colorless, prism                                                                                                |
| Crystal Dimensions   | 0.400 X 0.300 X 0.100 mm                                                                                        |
| Crystal System       | monoclinic                                                                                                      |
| Lattice Parameters   | a = 25.8200(6) Å<br>b = 6.09696(14) Å<br>c = 12.7480(3) Å<br>β = 94.7721(17) °<br>V = 1999.88(9) Å <sup>3</sup> |
| Space Group          | C2/c (#15)                                                                                                      |
| Z value              | 8                                                                                                               |
| D <sub>calc</sub>    | 1.343 g/cm <sup>3</sup>                                                                                         |
| F <sub>000</sub>     | 848.00                                                                                                          |
| μ(CuKα)              | 7.81 cm <sup>-1</sup>                                                                                           |
